# Supplementary material for: A new type of triphenylamine based coumarin–rhodamine hybrid compound: synthesis, photophysical properties, viscosity sensitivity and energy transfer
Source: Royal Society of Chemistry journal article supplement (doi:10.1039/c6ra24485h), 2016-01-01

**A new type of triphenylamine based coumarin-rhodamine hybrid compounds: Synthesis,  
Photophysical properties, viscosity sensitivity and energy transfer**

Shantaram Kothavale, Nagaiyan Sekar\*

Department of Dyestuff Technology, Institute of Chemical Technology, Matunga,

Mumbai - 400 019, India.

E-mail: n.sekar@ictmumbai.edu.in, nethi.sekar@gmail.com

Tel: +91 22 3361 2707; Fax: +91 22 3361 1020.

---

**Supporting information contents**

**List of Figures:**

**Figure S1:** Absorption spectra of **MCMR** in all solvents (spirocyclic form)

**Figure S2:** Emission spectra of **MCMR** in all solvents (spirocyclic form)

**Figure S3:** Absorption spectra of **MCMR** in all solvents (open form)

**Figure S4:** Emission spectra of **MCMR** in all solvents (open form)

**Figure S5:** Absorption spectra of **MCDR** in all solvents (spirocyclic form)

**Figure S6:** Emission spectra of **MCDR** in all solvents (spirocyclic form)

**Figure S7:** Normalized spectra of **MCDR** in all solvents (spirocyclic form)

**Figure S8:** Absorption spectra of **MCDR** in all solvents (open form)

**Figure S9:** Emission spectra of **MCDR** in all solvents (open form)

**Figure S10:** Absorption spectra of **DCDR** in all solvents (spirocyclic form)

**Figure S11:** Emission spectra of **DCDR** in all solvents (spirocyclic form)

**Figure S12:** Normalized spectra of **DCDR** in all solvents (spirocyclic form)

**Figure S13:** Absorption spectra of **DCDR** in all solvents (open form)

**Figure S14:** Emission spectra of **DCDR** in all solvents (open form)

**Figure S15:** Mac-Rae solvent polarity plots of **MCMR**, **MCDR** and **DCMR** in all solvents

**Figure S16:** Absorption spectra of **MCMR** with the increased percentage of TFA (5 to 90  $\mu$ l) in toluene

**Figure S17:** Emission spectra of **MCMR** with the increased percentage of TFA (5 to 90  $\mu$ l) in toluene

**Figure S18:** Emission spectra of **MCMR** (a) and **MCDR** (b) with the increased percentage of PEG in ethanol for their spirocyclic form.

**List of Tables:**

**Table S1:** Photophysical parameters of **MCMR** in all solvents (spirocyclic form)

**Table S2:** Photophysical parameters of **MCMR** in all solvents (open form)

**Table S3:** Photophysical parameters of **MCDR** in all solvents (spirocyclic form)

**Table S4:** Photophysical parameters of **MCDR** in all solvents (open form)

**Table S5:** Photophysical parameters of **DCMR** in all solvents (open form)

**Table S6:** Photophysical parameters of **DCMR** in all solvents (open form)

**Table S7:** Estimated Kamlet-Taft and Catalan parameters of **MCDR** (spirocyclic form)

**Table S8:** Estimated Kamlet-Taft and Catalan parameters of **DCMR** (spirocyclic form)

**List of Spectrum:**

**Spectrum S1:**  $^1\text{H}$  NMR spectra of **compound 2** in  $\text{DMSO-d}_6$

**Spectrum S2:**  $^{13}\text{C}$  NMR spectra of **compound 2** in  $\text{DMSO-d}_6$

**Spectrum S3:**  $^1\text{H}$  NMR spectra of **compound 5** in  $\text{DMSO-d}_6$

**Spectrum S4:**  $^{13}\text{C}$  NMR spectra of **compound 5** in  $\text{DMSO-d}_6$

**Spectrum S5:**  $^1\text{H}$  NMR spectra of **compound 8** in  $\text{CDCl}_3$

**Spectrum S6:**  $^{13}\text{C}$  NMR spectra of **compound 8** in  $\text{CDCl}_3$

**Spectrum S7:**  $^1\text{H}$  NMR spectra of **compound 9** in  $\text{DMSO-d}_6$

**Spectrum S8:**  $^{13}\text{C}$  NMR spectra of **compound 9** in  $\text{DMSO-d}_6$

**Spectrum S9:**  $^1\text{H}$  NMR spectra of **compound 3** in  $\text{DMSO-d}_6$

**Spectrum S10:**  $^{13}\text{C}$  NMR spectra of **compound 3** in  $\text{DMSO-d}_6$

**Spectrum S11:**  $^1\text{H}$  NMR spectra of **compound 6** in  $\text{DMSO-d}_6$

**Spectrum S12:**  $^{13}\text{C}$  NMR spectra of **compound 6** in  $\text{DMSO-d}_6$

**Spectrum S13:**  $^1\text{H}$  NMR spectra of **compound 10** in  $\text{DMSO-d}_6$

**Spectrum S14:**  $^{13}\text{C}$  NMR spectra of **compound 10** in  $\text{DMSO-d}_6$

**Spectrum S15:**  $^1\text{H}$  NMR spectra of **MCMR** in  $\text{CDCl}_3$

**Spectrum S16:**  $^{13}\text{C}$  NMR spectra of **MCMR** in  $\text{CDCl}_3$

**Spectrum S17:** HR-MS spectra of **MCMR**

**Spectrum S18:**  $^1\text{H}$  NMR spectra of **MCDR** in  $\text{DMSO-d}_6$

**Spectrum S19:**  $^{13}\text{C}$  NMR spectra of **MCDR** in  $\text{DMSO-d}_6$

**Spectrum S20:** HR-MS spectra of **MCDR**

**Spectrum S21:**  $^1\text{H}$  NMR spectra of **DCMR** in  $\text{DMSO-d}_6$

**Spectrum S22:**  $^{13}\text{C}$  NMR spectra of **DCMR** in  $\text{DMSO-d}_6$

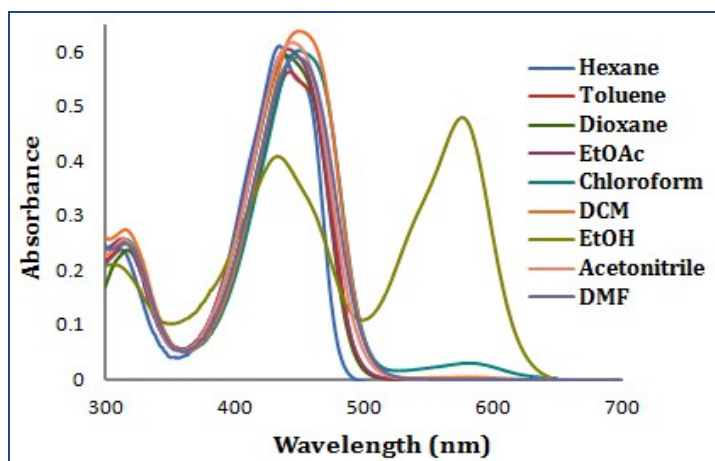

Figure S1: Absorption spectra of MCMR in all solvents (spirocyclic form)

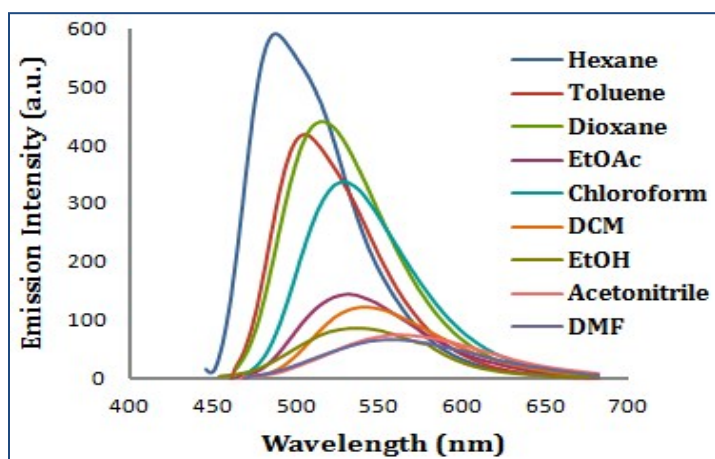

Figure S2: Emission spectra of MCMR in all solvents (spirocyclic form)

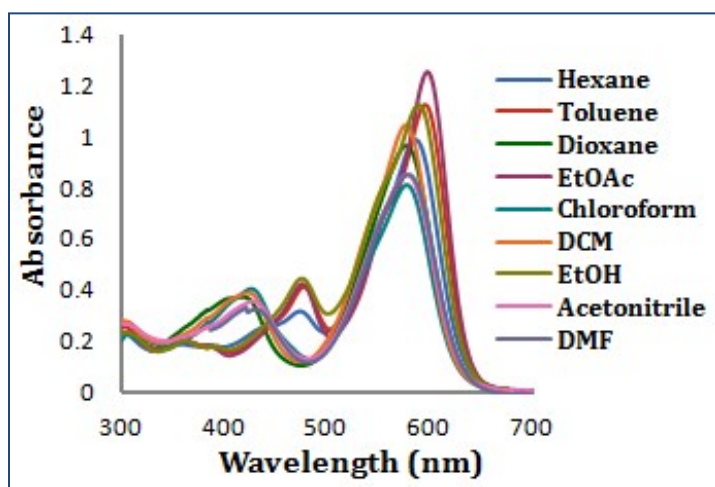

Figure S3: Absorption spectra of MCMR in all solvents (open form)

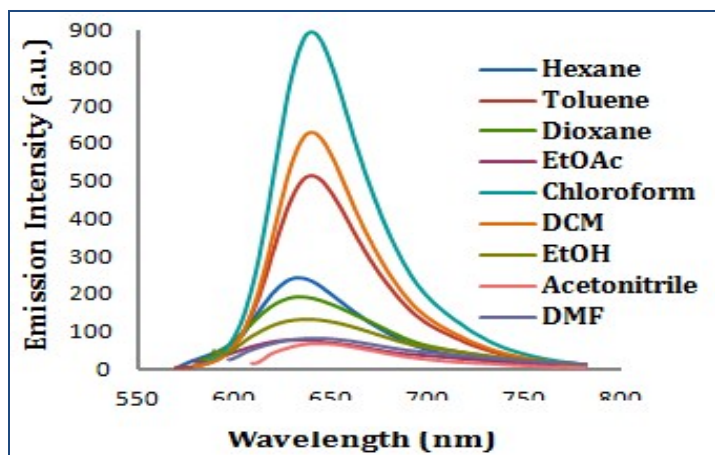

Figure S4: Emission spectra of MCMR in all solvents (open form)

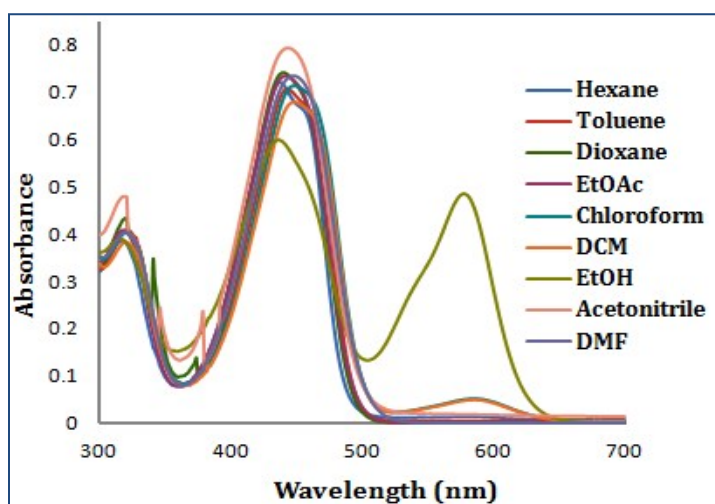

Figure S5: Absorption spectra of MCDR in all solvents (spirocyclic form)

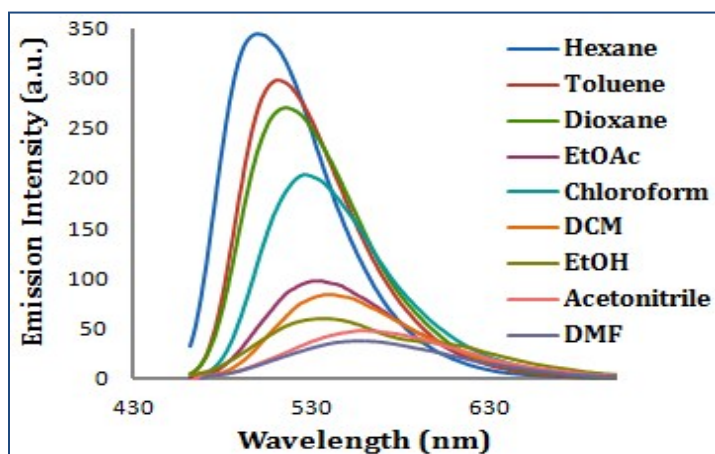

Figure S6: Emission spectra of MCDR in all solvents (spirocyclic form)

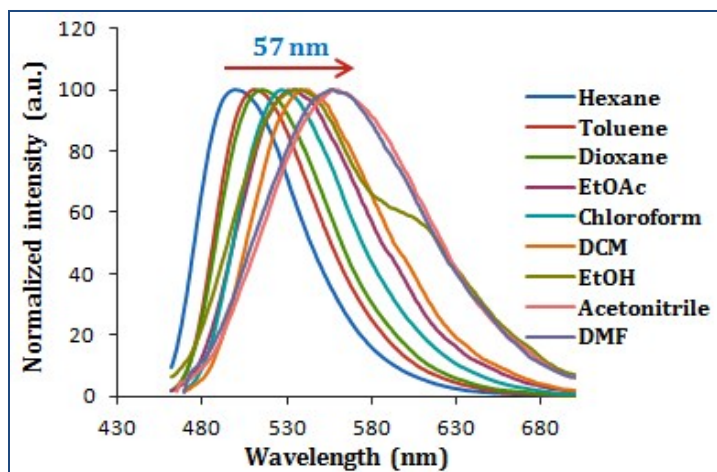

Figure S7: Normalized spectra of MCDR in all solvents (spirocyclic form)

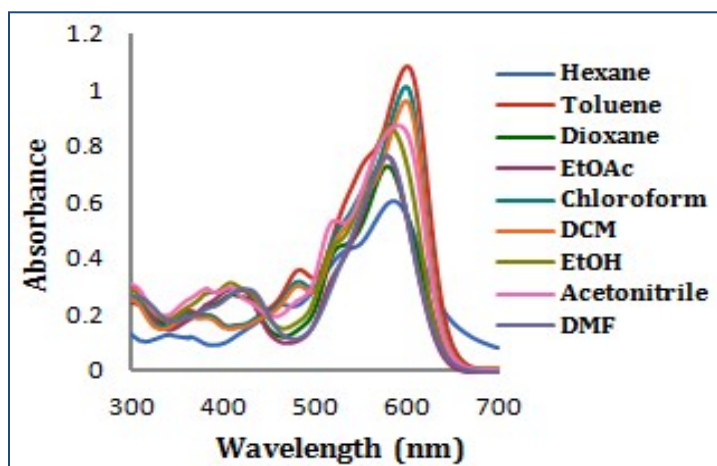

Figure S8: Absorption spectra of MCDR in all solvents (open form)

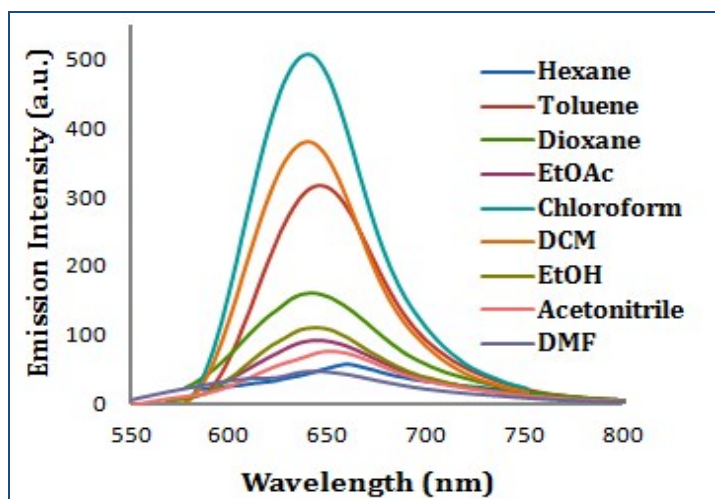

Figure S9: Emission spectra of MCDR in all solvents (open form)

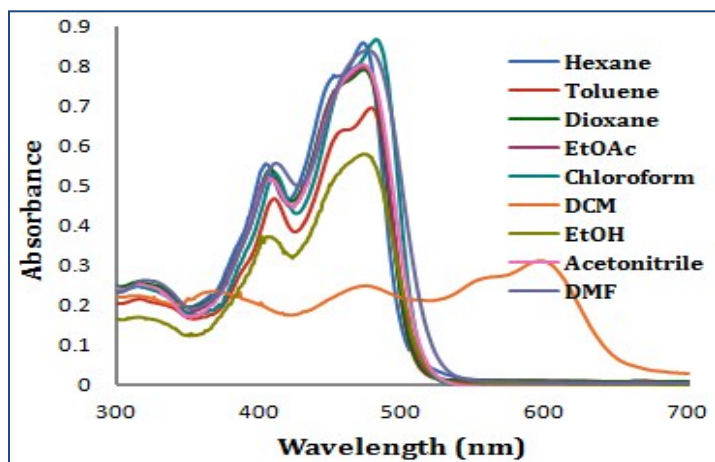

Figure S10: Absorption spectra of DCDR in all solvents (spirocyclic form)

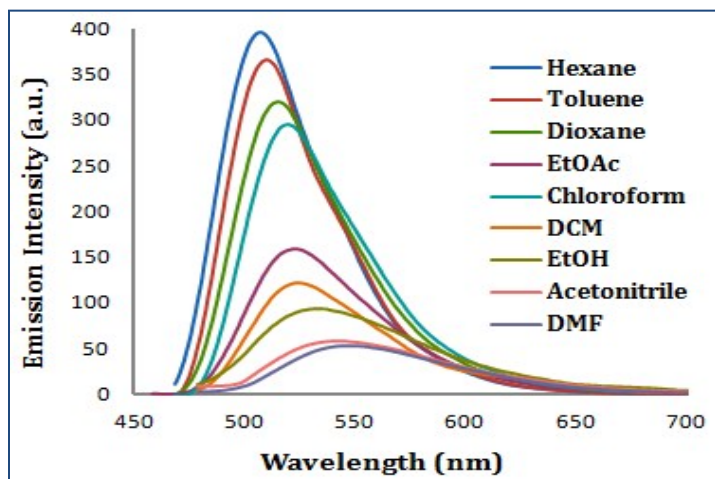

Figure S11: Emission spectra of DCDR in all solvents (spirocyclic form)

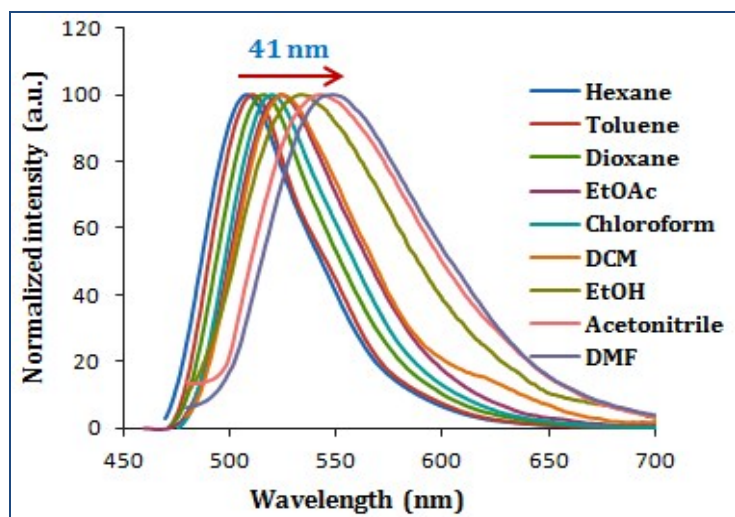

Figure S12: Normalized spectra of DCDR in all solvents (spirocyclic form)

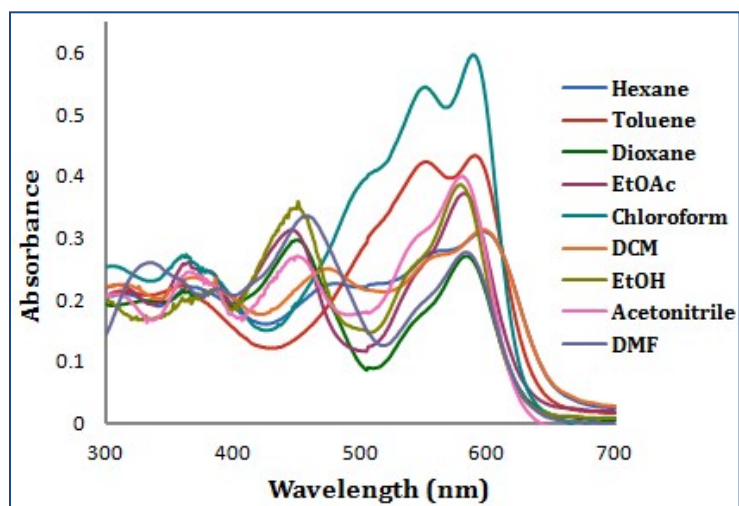

Figure S13: Absorption spectra of DCDR in all solvents (open form)

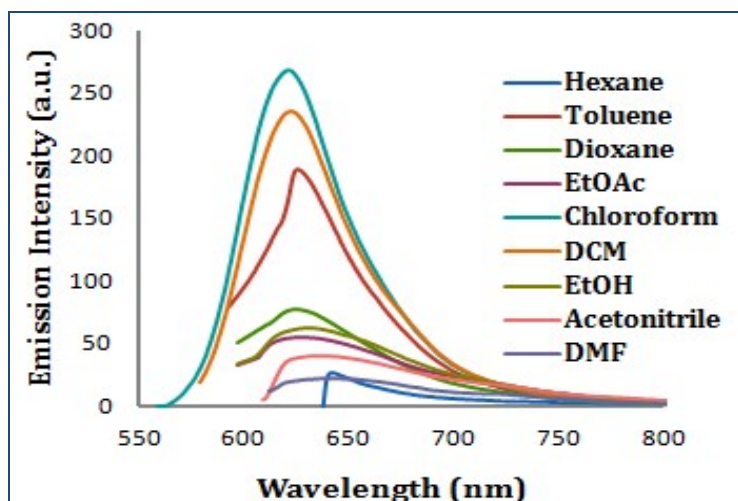

Figure S14: Emission spectra of DCDR in all solvents (open form)

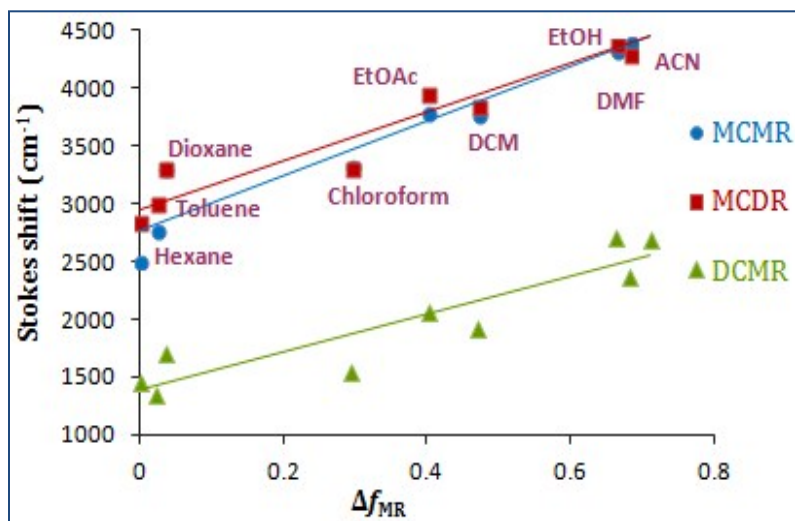

Figure S15: Mac-Rae solvent polarity plots of MCMR, MCDR and DCMR in all solvents



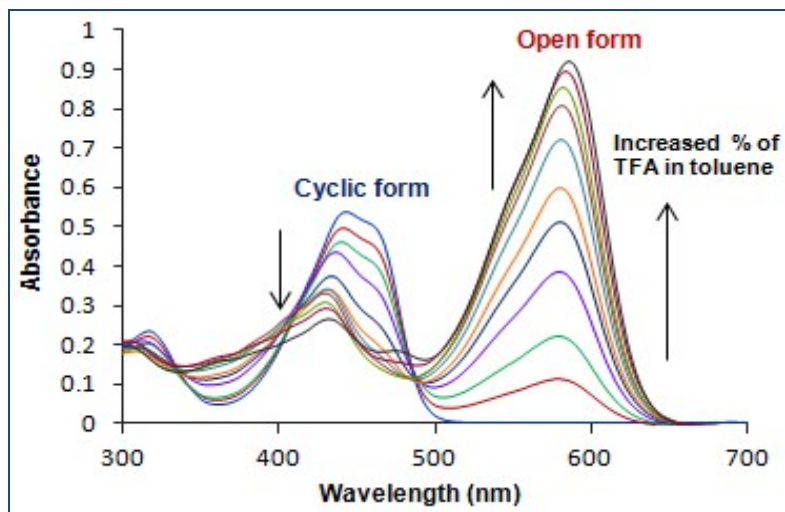

Figure S16: Absorption spectra of **MCMR** with the increased percentage of TFA (5 to 90  $\mu$ l) in toluene

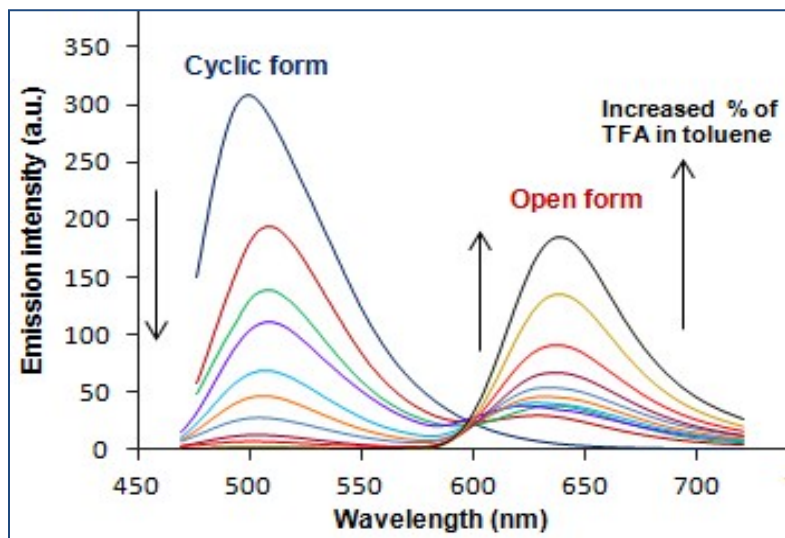

Figure S17: Emission spectra of **MCMR** with the increased percentage of TFA (5 to 90  $\mu$ l) in toluene

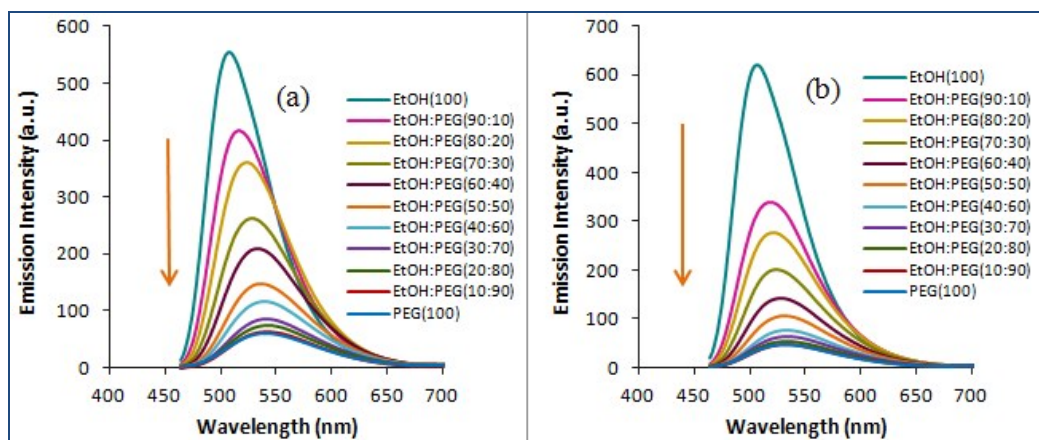

**Figure S18:** Emission spectra of **MCMR** (a) and **MCDR** (b) with the increased percentage of PEG in ethanol for their spirocyclic form.

**Table S1:** Photophysical parameters of **MCMR** in all solvents (spirocyclic form)

| Compound        | $\lambda_{\text{abs}}$<br>(nm) | $\epsilon_{\text{max}} \times 10^4$<br>( $\text{M}^{-1} \text{cm}^{-1}$ ) | fwhm<br>(nm) | $\lambda_{\text{ems}}$<br>(nm) | Stokes shift<br>(nm) | Stokes shift<br>( $\text{cm}^{-1}$ ) | f    | $\mu_{\text{ge}}$<br>(debye) |
|-----------------|--------------------------------|---------------------------------------------------------------------------|--------------|--------------------------------|----------------------|--------------------------------------|------|------------------------------|
| Hexane          | 435                            | 6.11                                                                      | 64           | 488                            | 53                   | 2497                                 | 0.98 | 9.55                         |
| Toluene         | 443                            | 5.62                                                                      | 68           | 505                            | 62                   | 2771                                 | 0.98 | 9.61                         |
| Dioxane         | 440                            | 5.94                                                                      | 68           | 515                            | 75                   | 3310                                 | 1.05 | 9.90                         |
| EtOAc           | 442                            | 6.04                                                                      | 68           | 531                            | 89                   | 3792                                 | 1.06 | 10.01                        |
| $\text{CHCl}_3$ | 450                            | 6.00                                                                      | 70           | 529                            | 79                   | 3319                                 | 1.07 | 10.11                        |
| DCM             | 450                            | 6.37                                                                      | 70           | 542                            | 92                   | 3772                                 | 1.12 | 10.38                        |
| EtOH            | 434                            | 4.09                                                                      | 83           | 536                            | 102                  | 4385                                 | 0.95 | 9.38                         |
| ACN             | 446                            | 6.16                                                                      | 70           | 560                            | 114                  | 4564                                 | 1.11 | 10.25                        |
| DMF             | 449                            | 5.90                                                                      | 72           | 557                            | 108                  | 4318                                 | 1.07 | 10.12                        |

**Table S2:** Photophysical parameters of **MCMR** in all solvents (open form)

| Compound        | $\lambda_{\text{abs}}$<br>(nm) | $\epsilon_{\text{max}} \times 10^4$<br>( $\text{M}^{-1} \text{cm}^{-1}$ ) | fwhm<br>(nm) | $\lambda_{\text{ems}}$<br>(nm) | Stokes shift<br>(nm) | Stokes shift<br>( $\text{cm}^{-1}$ ) | f    | $\mu_{\text{ge}}$<br>(debye) |
|-----------------|--------------------------------|---------------------------------------------------------------------------|--------------|--------------------------------|----------------------|--------------------------------------|------|------------------------------|
| Hexane          | 586                            | 9.85                                                                      | 77           | 632                            | 46                   | 1242                                 | 1.26 | 12.54                        |
| Toluene         | 596                            | 11.21                                                                     | 74           | 639                            | 43                   | 1129                                 | 1.40 | 13.33                        |
| Dioxane         | 577                            | 9.60                                                                      | 73           | 633                            | 56                   | 1533                                 | 1.09 | 11.59                        |
| EtOAc           | 598                            | 12.50                                                                     | 68           | 630                            | 32                   | 849                                  | 1.44 | 13.55                        |
| $\text{CHCl}_3$ | 577                            | 8.09                                                                      | 74           | 639                            | 62                   | 1682                                 | 0.95 | 10.83                        |

|             |     |       |    |     |    |      |      |       |
|-------------|-----|-------|----|-----|----|------|------|-------|
| <b>DCM</b>  | 577 | 10.42 | 71 | 639 | 62 | 1682 | 1.15 | 11.90 |
| <b>EtOH</b> | 589 | 11.24 | 79 | 637 | 48 | 1279 | 1.52 | 13.83 |
| <b>ACN</b>  | 578 | 8.53  | 75 | 643 | 65 | 1749 | 1.03 | 11.24 |
| <b>DMF</b>  | 579 | 8.49  | 76 | 642 | 63 | 1695 | 1.02 | 11.19 |

**Table S3:** Photophysical parameters of **MCDR** in all solvents (spirocyclic form)

| <b>Compound</b>         | $\lambda_{\text{abs}}$<br>(nm) | $\epsilon_{\text{max}} \times 10^4$<br>(M <sup>-1</sup> cm <sup>-1</sup> ) | <b>fwhm</b><br>(nm) | $\lambda_{\text{ems}}$<br>(nm) | <b>Stokes shift</b><br>(nm) | <b>Stokes shift</b><br>(cm <sup>-1</sup> ) | <b>f</b> | $\mu_{\text{ge}}$<br>(debye) |
|-------------------------|--------------------------------|----------------------------------------------------------------------------|---------------------|--------------------------------|-----------------------------|--------------------------------------------|----------|------------------------------|
| <b>Hexane</b>           | 438                            | 7.22                                                                       | 67                  | 500                            | 62                          | 2831                                       | 1.22     | 10.66                        |
| <b>Toluene</b>          | 443                            | 7.08                                                                       | 69                  | 511                            | 68                          | 3004                                       | 1.21     | 10.70                        |
| <b>Dioxane</b>          | 441                            | 7.41                                                                       | 68                  | 516                            | 75                          | 3296                                       | 1.28     | 10.95                        |
| <b>EtOAc</b>            | 441                            | 7.35                                                                       | 69                  | 534                            | 93                          | 3949                                       | 1.28     | 10.95                        |
| <b>CHCl<sub>3</sub></b> | 448                            | 7.16                                                                       | 71                  | 526                            | 78                          | 3310                                       | 1.27     | 10.99                        |
| <b>DCM</b>              | 448                            | 6.80                                                                       | 71                  | 541                            | 93                          | 3837                                       | 1.20     | 10.71                        |
| <b>EtOH</b>             | 436                            | 5.99                                                                       | 81                  | 536                            | 100                         | 4279                                       | 1.27     | 10.88                        |
| <b>ACN</b>              | 443                            | 7.94                                                                       | 72                  | 558                            | 115                         | 4652                                       | 1.47     | 11.79                        |
| <b>DMF</b>              | 448                            | 7.36                                                                       | 71                  | 557                            | 109                         | 4368                                       | 1.31     | 11.20                        |

**Table S4:** Photophysical parameters of **MCDR** in all solvents (open form)

| <b>Compound</b>         | $\lambda_{\text{abs}}$<br>(nm) | $\epsilon_{\text{max}} \times 10^4$<br>(M <sup>-1</sup> cm <sup>-1</sup> ) | <b>fwhm</b><br>(nm) | $\lambda_{\text{ems}}$<br>(nm) | <b>Stokes shift</b><br>(nm) | <b>Stokes shift</b><br>(cm <sup>-1</sup> ) | <b>f</b> | $\mu_{\text{ge}}$<br>(debye) |
|-------------------------|--------------------------------|----------------------------------------------------------------------------|---------------------|--------------------------------|-----------------------------|--------------------------------------------|----------|------------------------------|
| <b>Hexane</b>           | 586                            | 6.05                                                                       | 124                 | 660                            | 74                          | 1913                                       | 1.05     | 11.45                        |
| <b>Toluene</b>          | 601                            | 10.83                                                                      | 100                 | 646                            | 45                          | 1159                                       | 1.52     | 13.95                        |
| <b>Dioxane</b>          | 580                            | 7.24                                                                       | 101                 | 642                            | 62                          | 1665                                       | 0.97     | 10.94                        |
| <b>EtOAc</b>            | 579                            | 7.60                                                                       | 81                  | 644                            | 65                          | 1743                                       | 0.91     | 10.57                        |
| <b>CHCl<sub>3</sub></b> | 600                            | 10.10                                                                      | 96                  | 640                            | 40                          | 1042                                       | 1.35     | 13.14                        |
| <b>DCM</b>              | 600                            | 9.60                                                                       | 96                  | 640                            | 40                          | 1042                                       | 1.28     | 12.81                        |
| <b>EtOH</b>             | 582                            | 8.63                                                                       | 98                  | 644                            | 62                          | 1654                                       | 1.14     | 11.89                        |
| <b>ACN</b>              | 591                            | 8.70                                                                       | 114                 | 652                            | 61                          | 1583                                       | 1.30     | 12.80                        |
| <b>DMF</b>              | 580                            | 7.60                                                                       | 82                  | 642                            | 62                          | 1665                                       | 0.92     | 10.67                        |

**Table S5:** Photophysical parameters of **DCMR** in all solvents (spirocyclic form)

| <b>Compound</b> | $\lambda_{\text{abs}}$<br>(nm) | $\epsilon_{\text{max}} \times 10^4$<br>(M <sup>-1</sup> cm <sup>-1</sup> ) | <b>fwhm</b><br>(nm) | $\lambda_{\text{ems}}$<br>(nm) | <b>Stokes shift</b><br>(nm) | <b>Stokes shift</b><br>(cm <sup>-1</sup> ) | <b>f</b> | $\mu_{\text{ge}}$<br>(debye) |
|-----------------|--------------------------------|----------------------------------------------------------------------------|---------------------|--------------------------------|-----------------------------|--------------------------------------------|----------|------------------------------|
| <b>Hexane</b>   | 472                            | 8.58                                                                       | 94                  | 507                            | 35                          | 1463                                       | 1.79     | 13.42                        |

|                         |     |      |     |     |    |      |      |       |
|-------------------------|-----|------|-----|-----|----|------|------|-------|
| <b>Toluene</b>          | 478 | 6.95 | 96  | 511 | 33 | 1351 | 1.48 | 12.26 |
| <b>Dioxane</b>          | 474 | 7.91 | 99  | 516 | 42 | 1717 | 1.73 | 13.23 |
| <b>EtOAc</b>            | 472 | 8.02 | 99  | 523 | 51 | 2066 | 1.74 | 13.22 |
| <b>CHCl<sub>3</sub></b> | 481 | 8.68 | 97  | 520 | 39 | 1559 | 1.76 | 13.43 |
| <b>DCM</b>              | 476 | 2.5  | 163 | 524 | 48 | 1924 | 0.85 | 9.27  |
| <b>EtOH</b>             | 473 | 5.79 | 102 | 533 | 60 | 2380 | 1.27 | 11.30 |
| <b>ACN</b>              | 473 | 8.05 | 102 | 542 | 69 | 2691 | 1.75 | 13.29 |
| <b>DMF</b>              | 477 | 8.41 | 106 | 548 | 71 | 2716 | 1.92 | 13.97 |

**Table S6:** Photophysical parameters of **DCMR** in all solvents (open form)

| <b>Compound</b>         | $\lambda_{\text{abs}}$<br>(nm) | $\epsilon_{\text{max}} \times 10^4$<br>(M <sup>-1</sup> cm <sup>-1</sup> ) | <b>fwhm</b><br>(nm) | $\lambda_{\text{ems}}$<br>(nm) | <b>Stokes shift</b><br>(nm) | <b>Stokes shift</b><br>(cm <sup>-1</sup> ) | <b>f</b> | $\mu_{\text{ge}}$<br>(debye) |
|-------------------------|--------------------------------|----------------------------------------------------------------------------|---------------------|--------------------------------|-----------------------------|--------------------------------------------|----------|------------------------------|
| <b>Hexane</b>           | 595                            | 3.11                                                                       | 129                 | 642                            | 47                          | 1230                                       | 0.49     | 7.92                         |
| <b>Toluene</b>          | 590                            | 4.33                                                                       | 116                 | 626                            | 36                          | 975                                        | 0.65     | 9.04                         |
| <b>Dioxane</b>          | 582                            | 5.94                                                                       | 77                  | 625                            | 43                          | 1182                                       | 0.29     | 6.02                         |
| <b>EtOAc</b>            | 581                            | 3.73                                                                       | 78                  | 628                            | 47                          | 1288                                       | 0.41     | 7.16                         |
| <b>CHCl<sub>3</sub></b> | 588                            | 5.96                                                                       | 109                 | 621                            | 33                          | 904                                        | 0.80     | 9.99                         |
| <b>DCM</b>              | 595                            | 3.12                                                                       | 129                 | 622                            | 27                          | 730                                        | 0.48     | 7.83                         |
| <b>EtOH</b>             | 578                            | 3.87                                                                       | 77                  | 631                            | 53                          | 1453                                       | 0.42     | 7.15                         |
| <b>ACN</b>              | 580                            | 4.01                                                                       | 86                  | 636                            | 56                          | 1518                                       | 0.45     | 7.47                         |
| <b>DMF</b>              | 582                            | 3.36                                                                       | 108                 | 643                            | 61                          | 1630                                       | 0.32     | 6.27                         |

**Table S7:** Estimated coefficients ( $y_0$ , a, b, c, d), their standard errors and correlation coefficients (r) for the multi-linear analysis of ( $\bar{\nu}_{\text{abs}}$ ), ( $\bar{\nu}_{\text{emi}}$ ) and ( $\Delta\bar{\nu}$ ) of **MCDR** as a function of Kamlet-Taft (2) and Catalan (3) solvent scales. Where,  $\alpha$  or SA for solvent acidity,  $\beta$  or SB for solvent basicity,  $\pi^*$  for collective parameter of solvent dipolarity and polarizability in the case of Kamlet-Taft equation, SdP and SP for solvent dipolarity and polarizability respectively in the case of Catalan equation.

| <b>Kamlet-Taft</b>       | $y_0 \times 10^3$ | $a_\alpha$      | $b_\beta$       | $c_{\pi^*}$      | <b>r</b>        |          |
|--------------------------|-------------------|-----------------|-----------------|------------------|-----------------|----------|
| $\bar{\nu}_{\text{abs}}$ | 22.84 ± 0.10      | 0.15 ± 0.19     | 0.48 ± 0.21     | -0.76 ± 0.19     | 0.69            |          |
| $\bar{\nu}_{\text{emi}}$ | 20.14 ± 0.34      | -0.34 ± 0.62    | -0.44 ± 0.71    | -1.86 ± 0.63     | 0.65            |          |
| $\Delta\bar{\nu}$        | 2.70 ± 0.34       | 0.49 ± 0.62     | 0.92 ± 0.71     | 1.10 ± 0.63      | 0.58            |          |
| <b>Catalan</b>           | $y_0 \times 10^3$ | $a_{\text{SA}}$ | $b_{\text{SB}}$ | $c_{\text{SdP}}$ | $d_{\text{SP}}$ | <b>r</b> |
| $\bar{\nu}_{\text{abs}}$ | 23.96 ± 0.20      | 0.41 ± 0.20     | 0.40 ± 0.12     | -0.41 ± 0.08     | -1.81 ± 0.29    | 0.93     |

|                 |                  |                 |                 |                  |                  |      |
|-----------------|------------------|-----------------|-----------------|------------------|------------------|------|
| $\bar{u}_{emi}$ | $20.04 \pm 0.70$ | $0.36 \pm 0.70$ | $0.04 \pm 0.40$ | $-2.08 \pm 0.26$ | $0.08 \pm 0.99$  | 0.92 |
| $\Delta\bar{u}$ | $3.92 \pm 0.71$  | $0.05 \pm 0.71$ | $0.36 \pm 0.40$ | $1.67 \pm 0.26$  | $-1.88 \pm 1.00$ | 0.89 |

**Table S8:** Estimated coefficients ( $y_0$ , a, b, c, d), their standard errors and correlation coefficients (r) for the multi-linear analysis of ( $\bar{u}_{abs}$ ), ( $\bar{u}_{emi}$ ) and ( $\Delta\bar{u}$ ) of **DCMR** as a function of Kamlet-Taft (2) and Catalan (3) solvent scales. Where,  $\alpha$  or SA for solvent acidity,  $\beta$  or SB for solvent basicity,  $\pi^*$  for collective parameter of solvent dipolarity and polarizability in the case of Kamlet-Taft equation, SdP and SP for solvent dipolarity and polarizability respectively in the case of Catalan equation.

| <b>Kamlet-Taft</b> | $y_0 \times 10^3$ | $a_\alpha$       | $b_\beta$        | $c_{\pi^*}$      |                  | <b>r</b> |
|--------------------|-------------------|------------------|------------------|------------------|------------------|----------|
| $\bar{u}_{abs}$    | $21.14 \pm 0.11$  | $-0.08 \pm 0.20$ | $0.34 \pm 0.23$  | $-0.33 \pm 0.20$ |                  | 0.03     |
| $\bar{u}_{emi}$    | $19.89 \pm 0.23$  | $-0.15 \pm 0.42$ | $-0.80 \pm 0.48$ | $-0.92 \pm 0.42$ |                  | 0.67     |
| $\Delta\bar{u}$    | $1.25 \pm 0.27$   | $0.07 \pm 0.50$  | $1.13 \pm 0.57$  | $0.59 \pm 0.51$  |                  | 0.57     |
| <b>Catalan</b>     | $y_0 \times 10^3$ | $a_{SA}$         | $b_{SB}$         | $c_{SdP}$        | $d_{SP}$         | <b>r</b> |
| $\bar{u}_{abs}$    | $22.11 \pm 0.20$  | $-0.39 \pm 0.20$ | $0.32 \pm 0.12$  | $-0.05 \pm 0.08$ | $-1.55 \pm 0.29$ | 0.81     |
| $\bar{u}_{emi}$    | $20.03 \pm 0.91$  | $-0.18 \pm 0.90$ | $-0.32 \pm 0.51$ | $-1.16 \pm 0.34$ | $-0.19 \pm 1.28$ | 0.72     |
| $\Delta\bar{u}$    | $2.08 \pm 0.98$   | $-0.20 \pm 0.97$ | $0.64 \pm 0.55$  | $1.11 \pm 0.37$  | $-1.36 \pm 1.38$ | 0.70     |

Spectrum S1:  $^1\text{H}$  NMR spectra of compound 2 in  $\text{DMSO-d}_6$

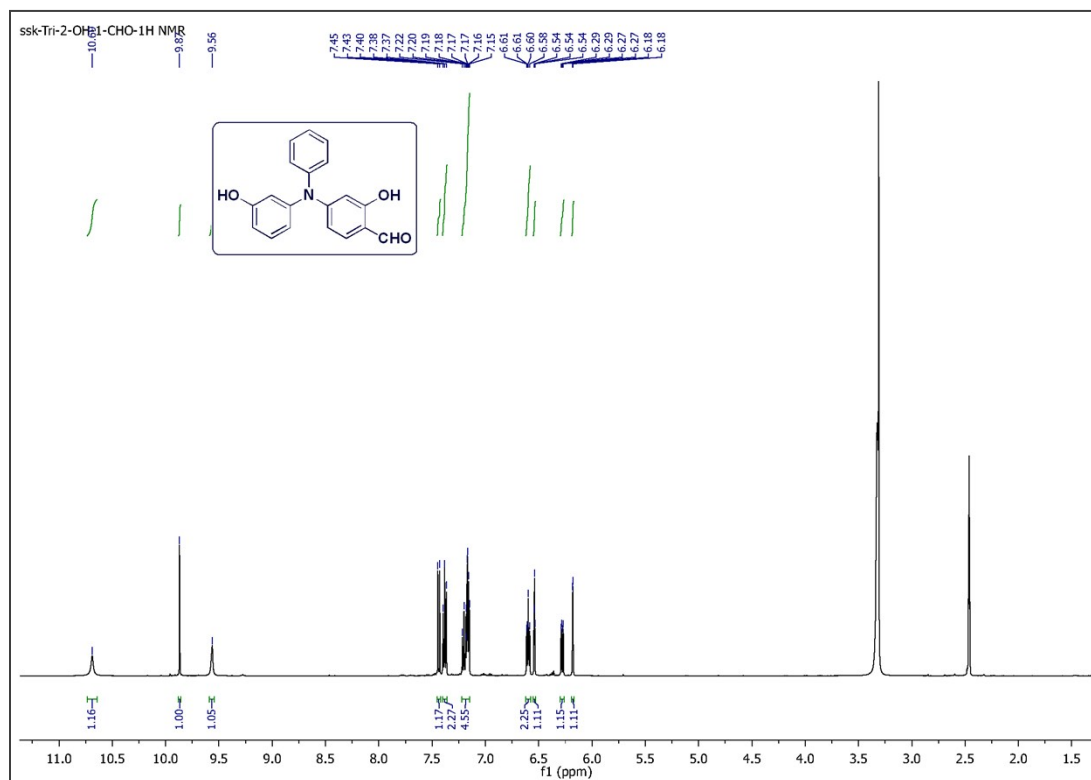

**Spectrum S2:**  $^{13}\text{C}$  NMR spectra of **compound 2** in  $\text{DMSO-d}_6$

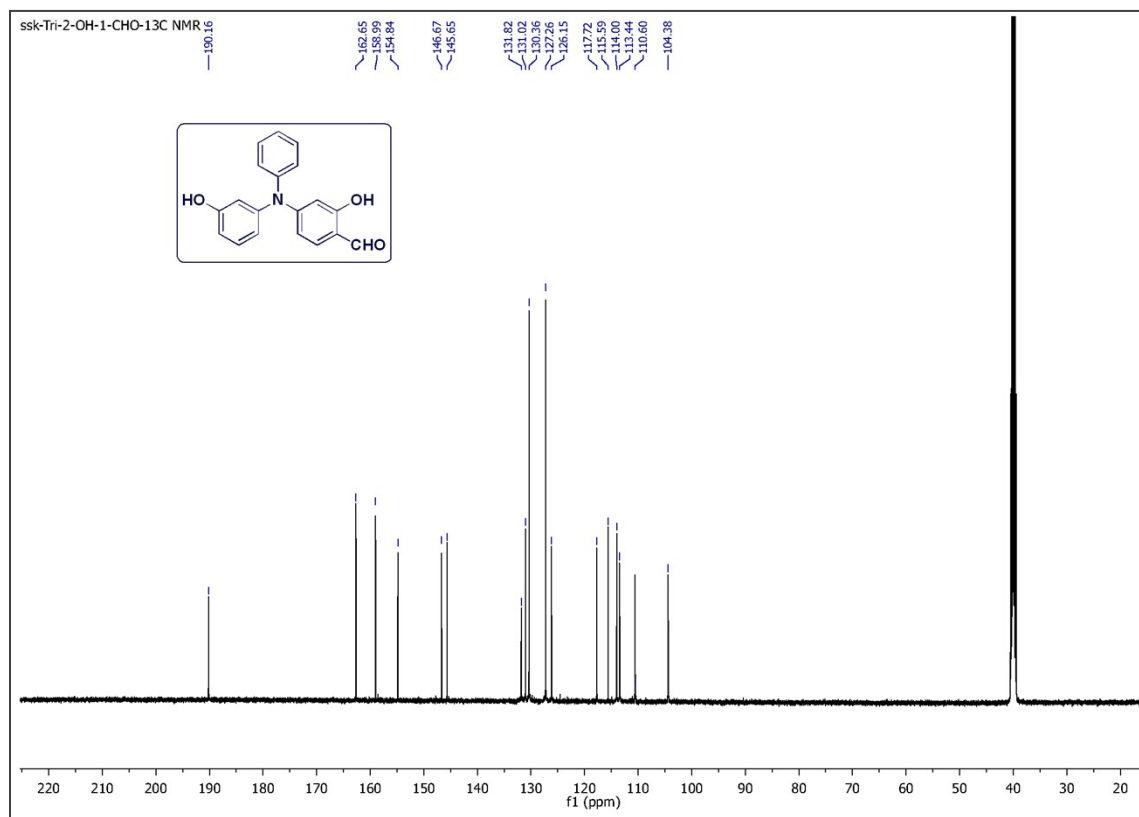

**Spectrum S3:**  $^1\text{H}$  NMR spectra of **compound 5** in  $\text{DMSO-d}_6$

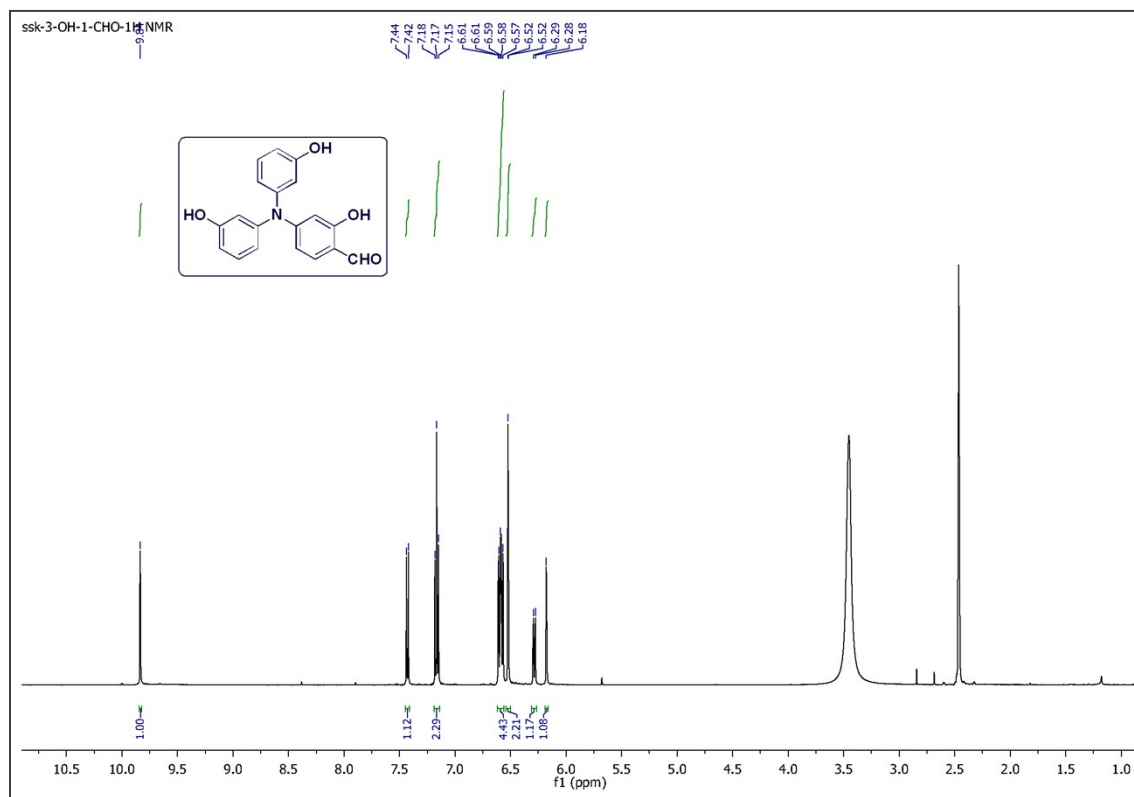



**Spectrum S4:**  $^{13}\text{C}$  NMR spectra of **compound 5** in  $\text{DMSO-d}_6$

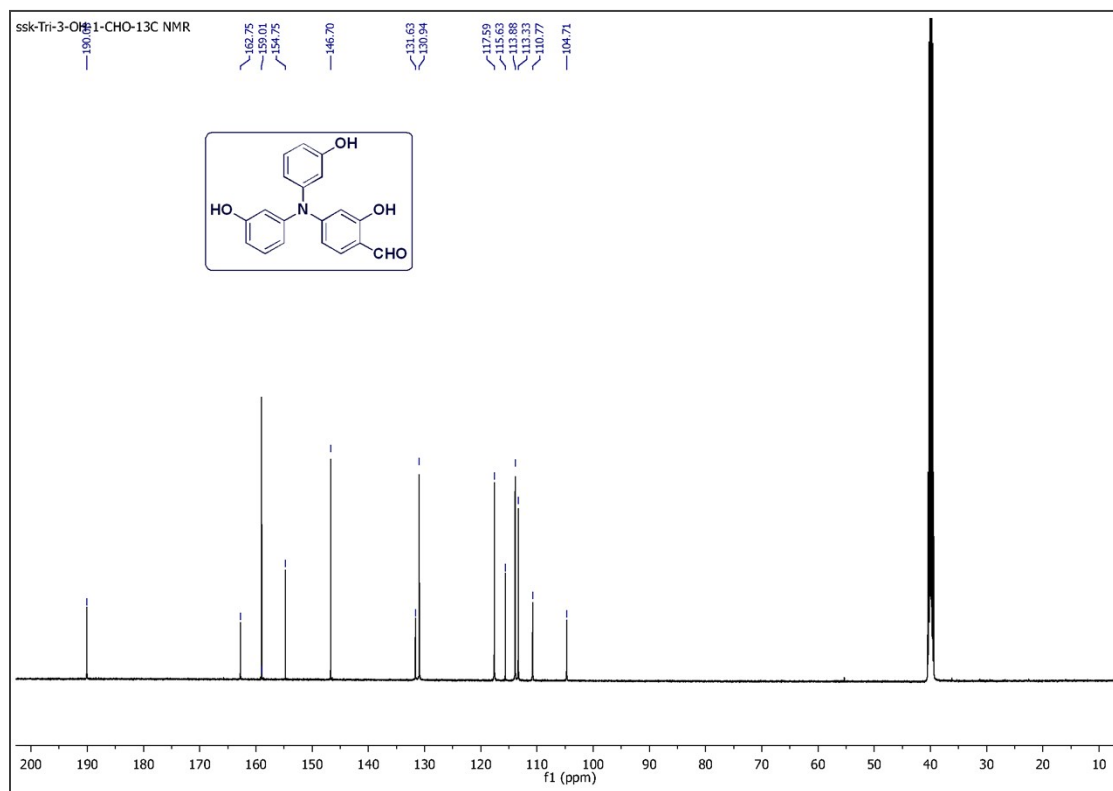

Spectrum S5:  $^1\text{H}$  NMR spectra of compound **8** in  $\text{CDCl}_3$

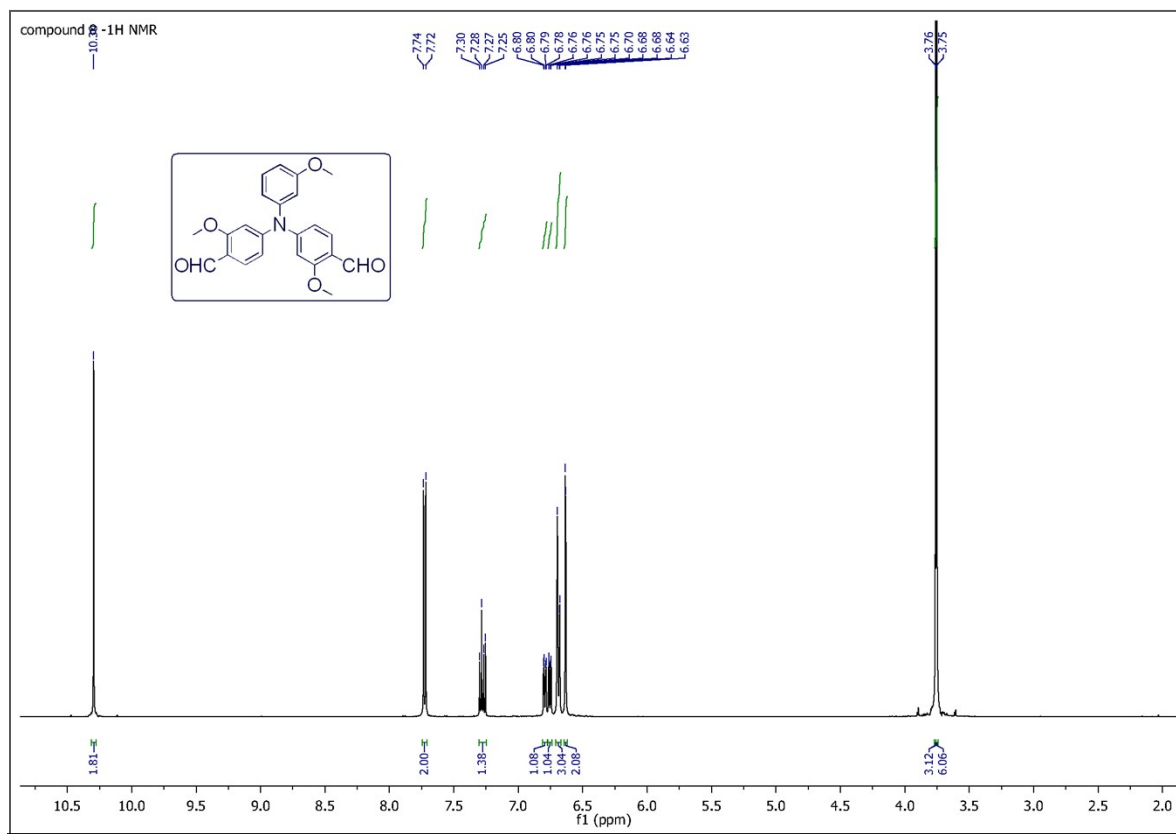

**Spectrum S6:**  $^{13}\text{C}$  NMR spectra of **compound 8** in  $\text{CDCl}_3$

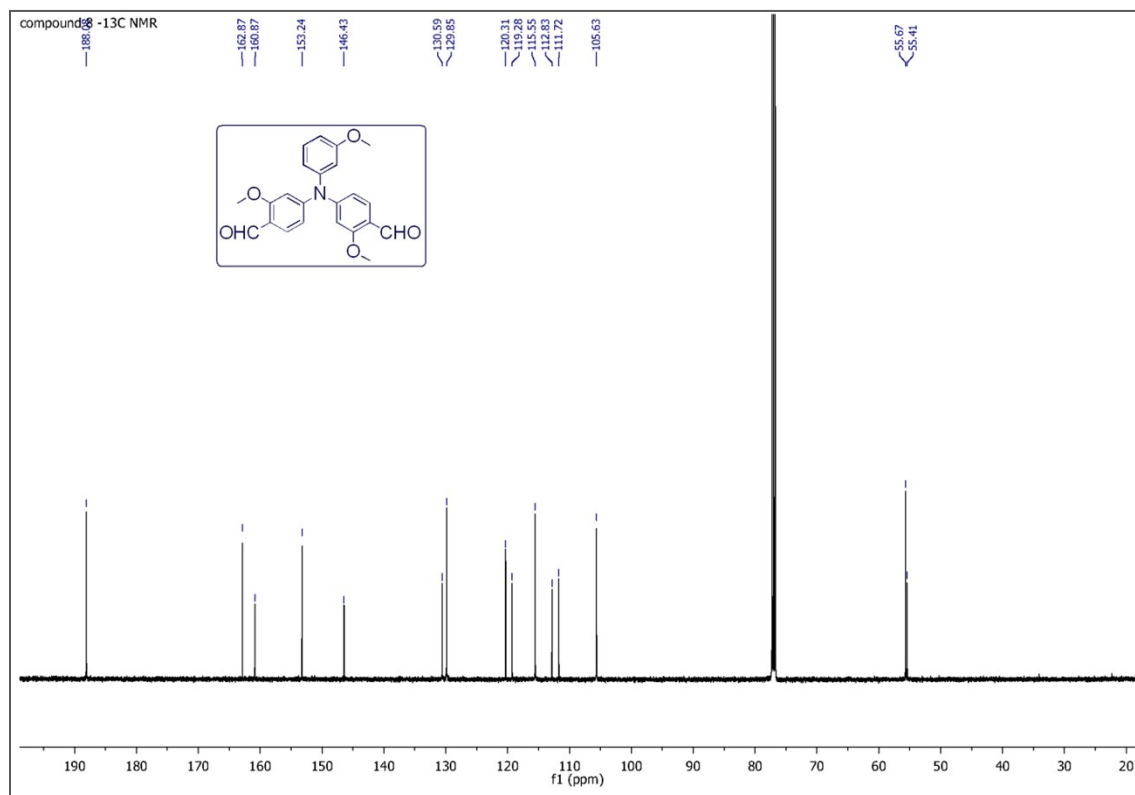

Spectrum S7:  $^1\text{H}$  NMR spectra of compound **9** in  $\text{DMSO-d}_6$

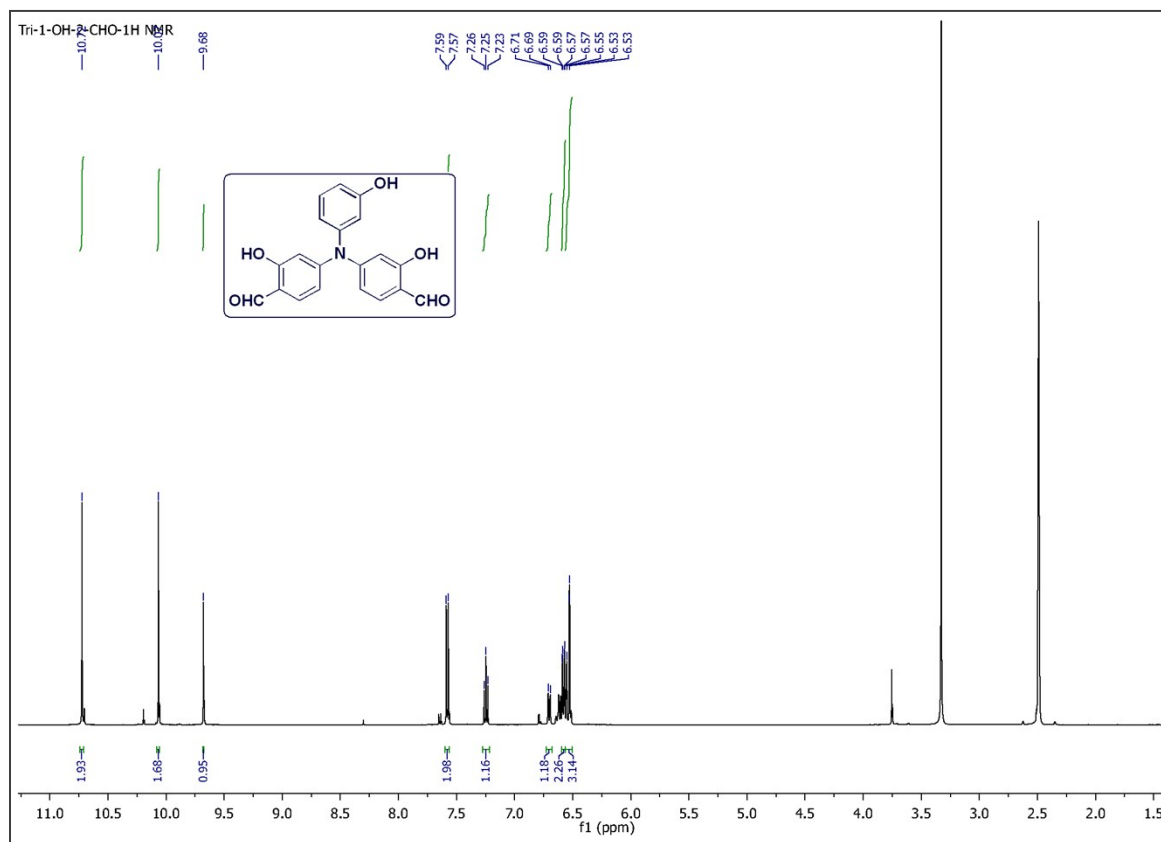

**Spectrum S8:**  $^{13}\text{C}$  NMR spectra of **compound 9** in  $\text{DMSO-d}_6$

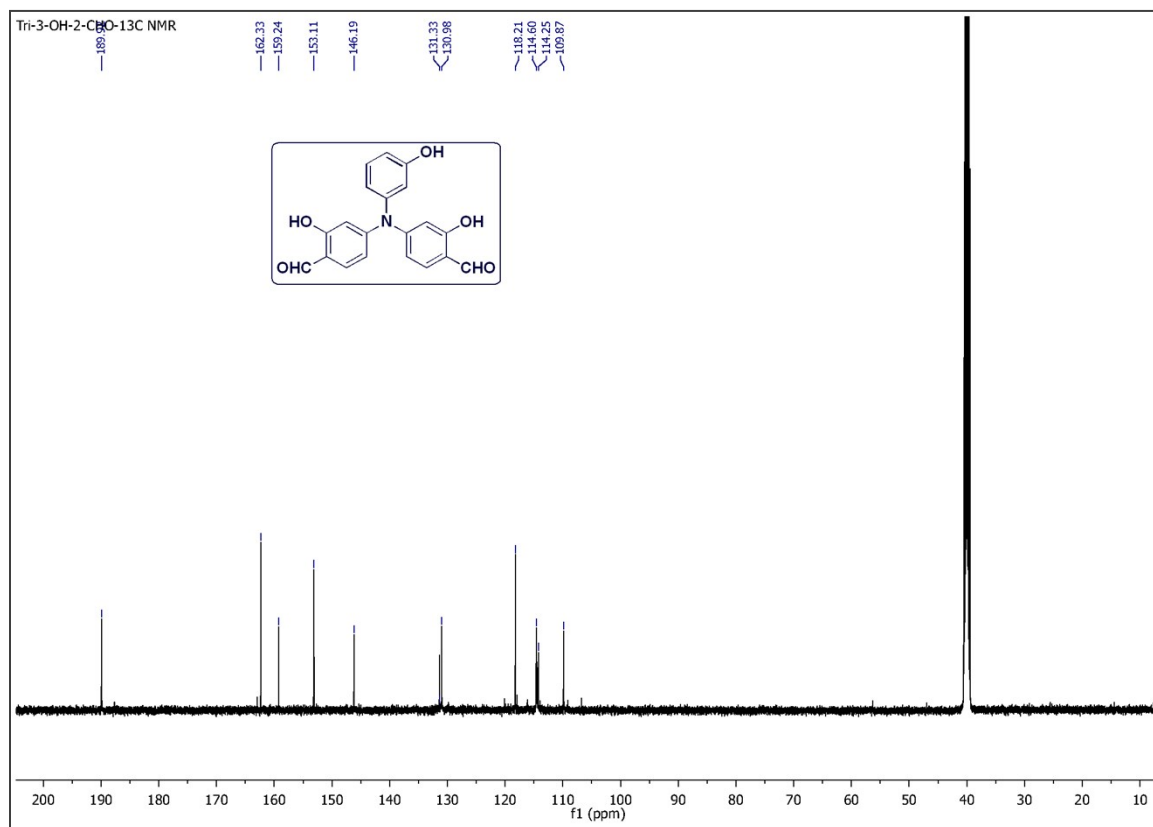

**Spectrum S9:**  $^1\text{H}$  NMR spectra of **compound 3** in  $\text{DMSO-d}_6$

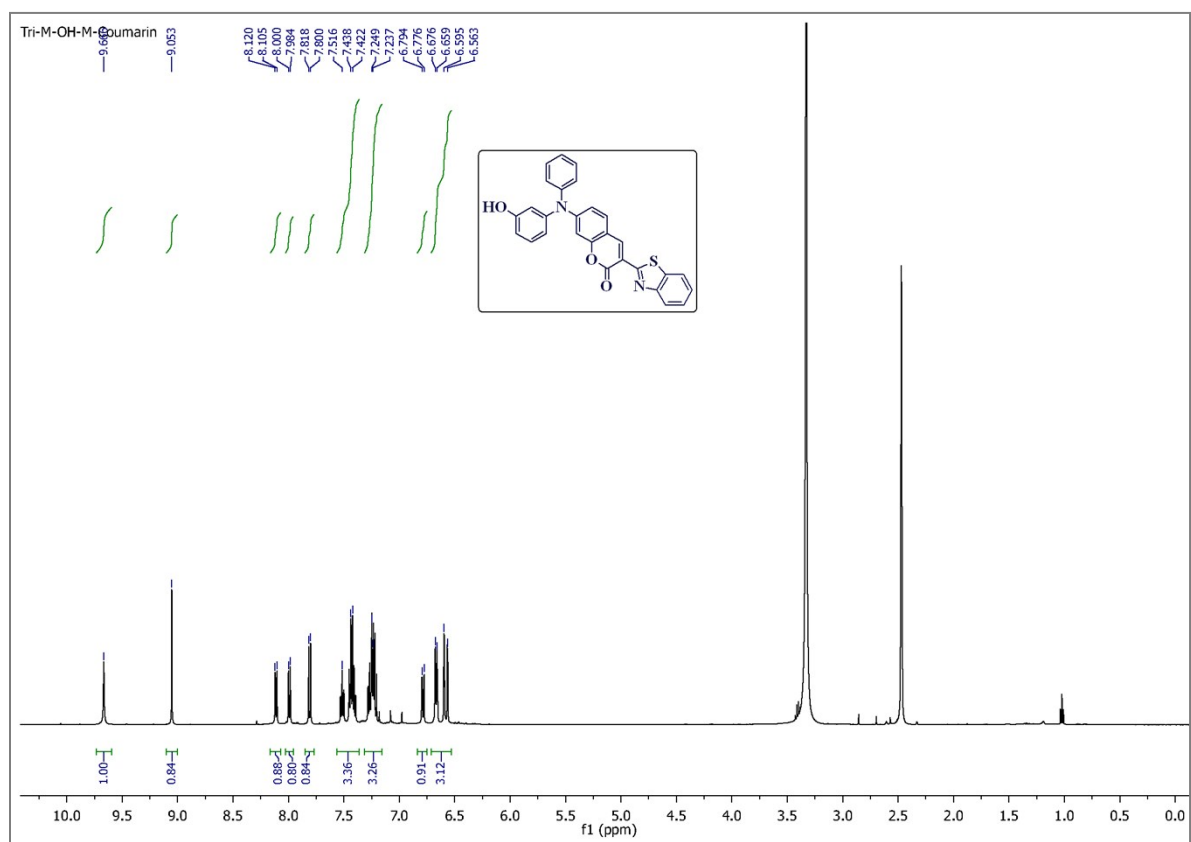

**Spectrum S10:**  $^{13}\text{C}$  NMR spectra of **compound 3** in  $\text{DMSO-d}_6$

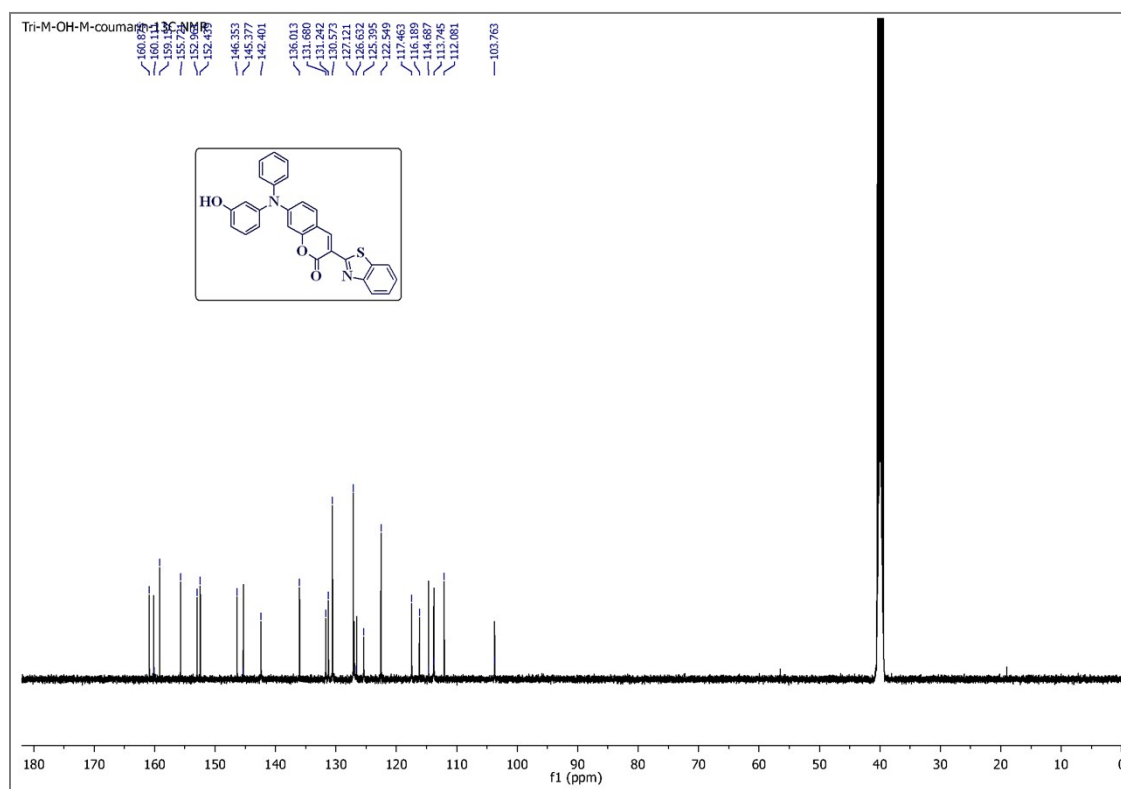

**Spectrum S11:**  $^1\text{H}$  NMR spectra of **compound 6** in  $\text{DMSO-d}_6$

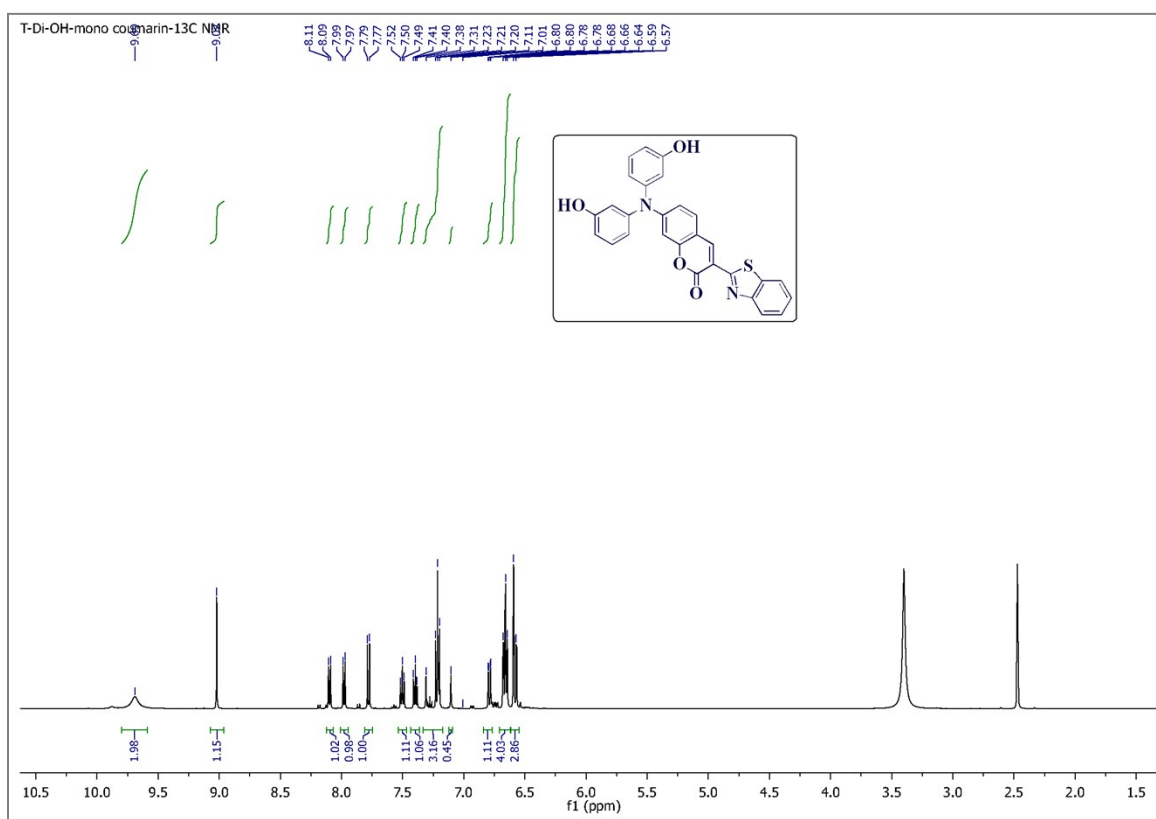



**Spectrum S12:**  $^{13}\text{C}$  NMR spectra of **compound 6** in  $\text{DMSO-d}_6$

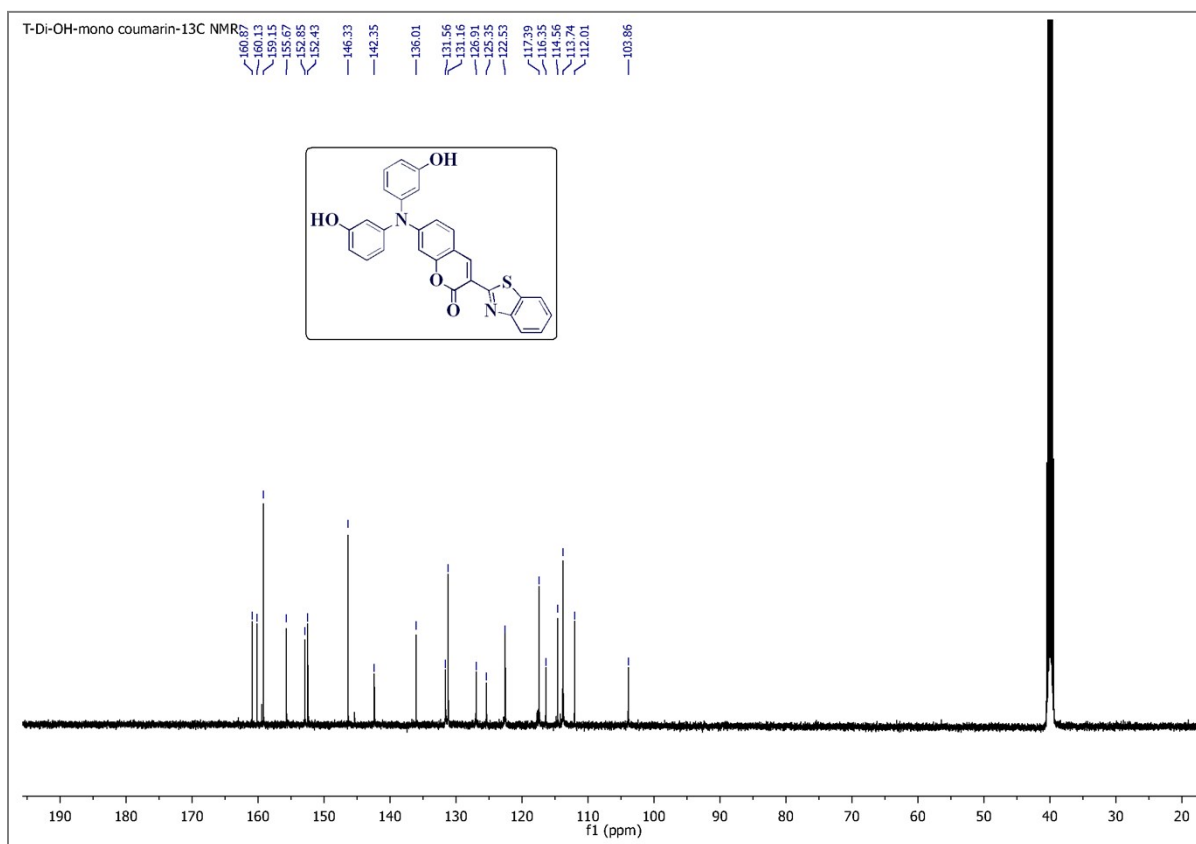

**Spectrum S13:**  $^1\text{H}$  NMR spectra of **compound 10** in  $\text{DMSO-d}_6$

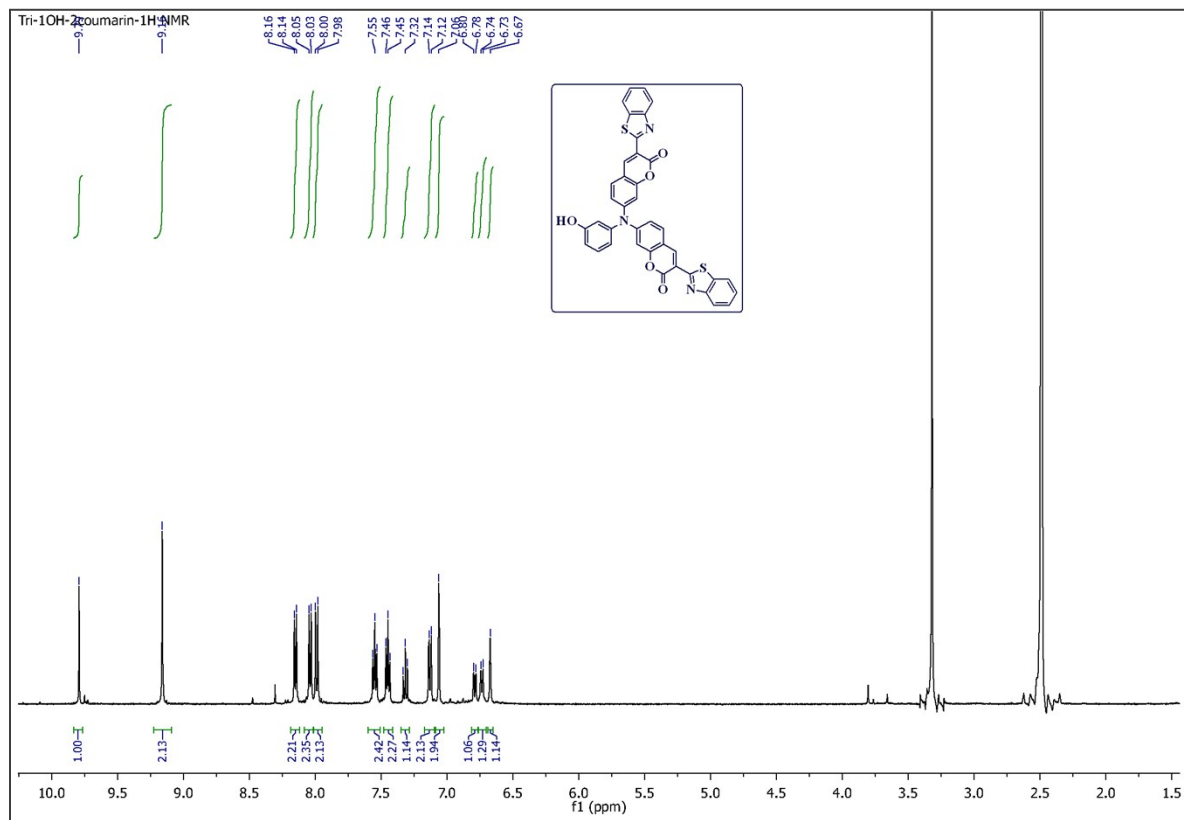

Tri-1OH-2-coumarin-1H-NMR

8.16  
8.14  
8.08  
8.00  
7.98  
7.55  
7.46  
7.45  
7.32  
7.14  
7.12  
6.88  
6.79  
6.74  
6.67

1.00  
2.13  
2.21  
2.35  
2.13  
2.42  
2.24  
2.13  
1.94  
1.06  
1.29  
1.14

f1 (ppm)

**Spectrum S14:**  $^{13}\text{C}$  NMR spectra of **compound 10** in  $\text{DMSO-d}_6$

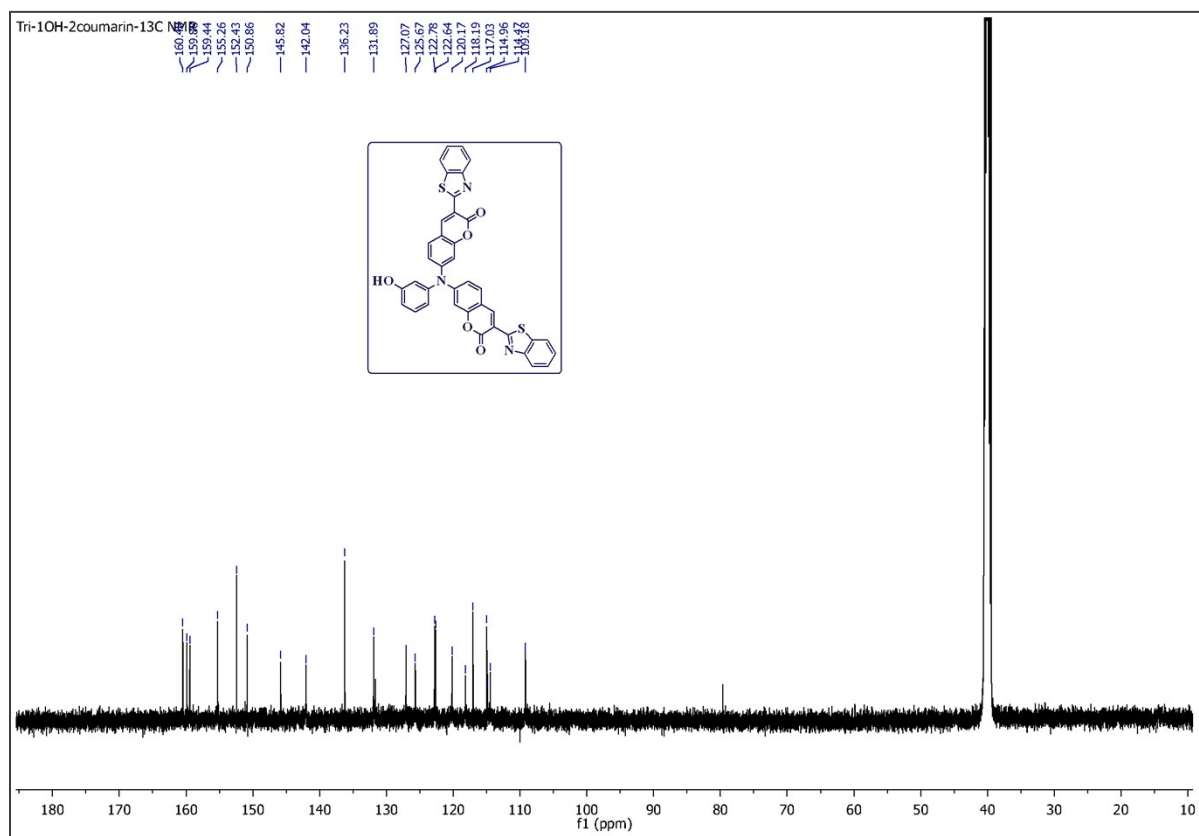

Spectrum S15:  $^1\text{H}$  NMR spectra of MCMR in  $\text{CDCl}_3$

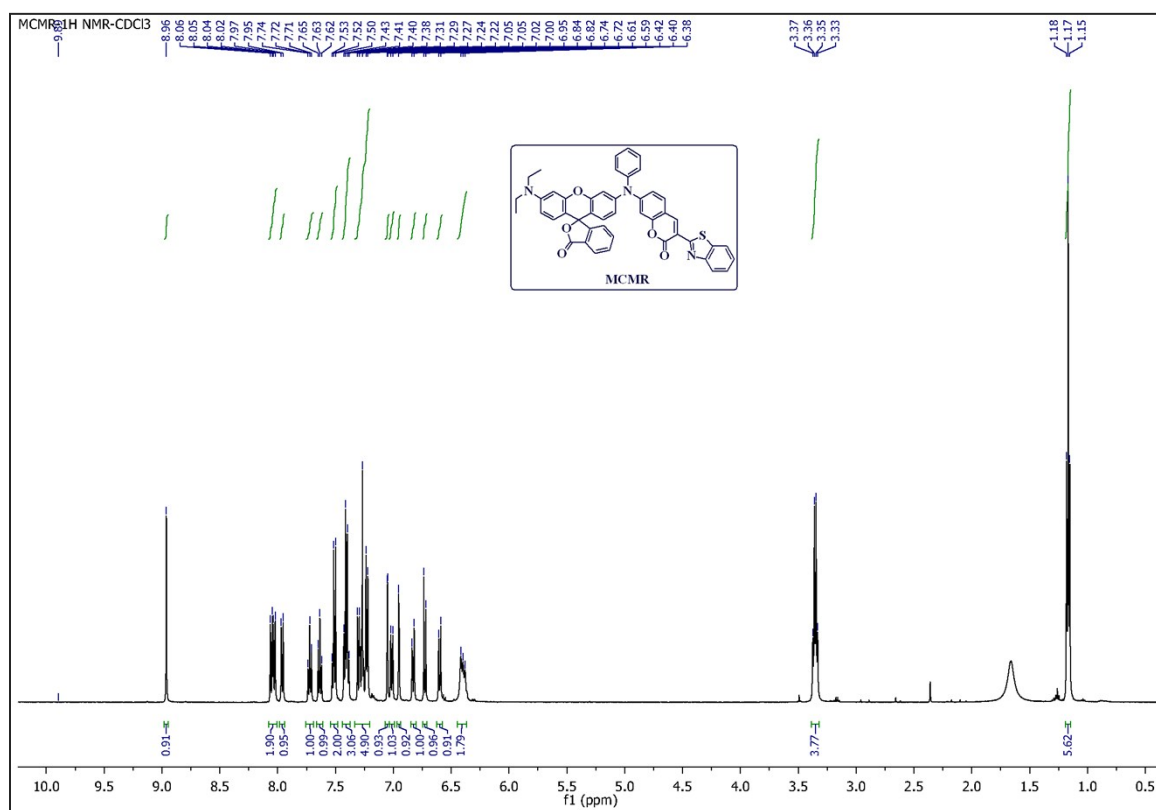

**Spectrum S16:**  $^{13}\text{C}$  NMR spectra of **MCMR** in  $\text{CDCl}_3$

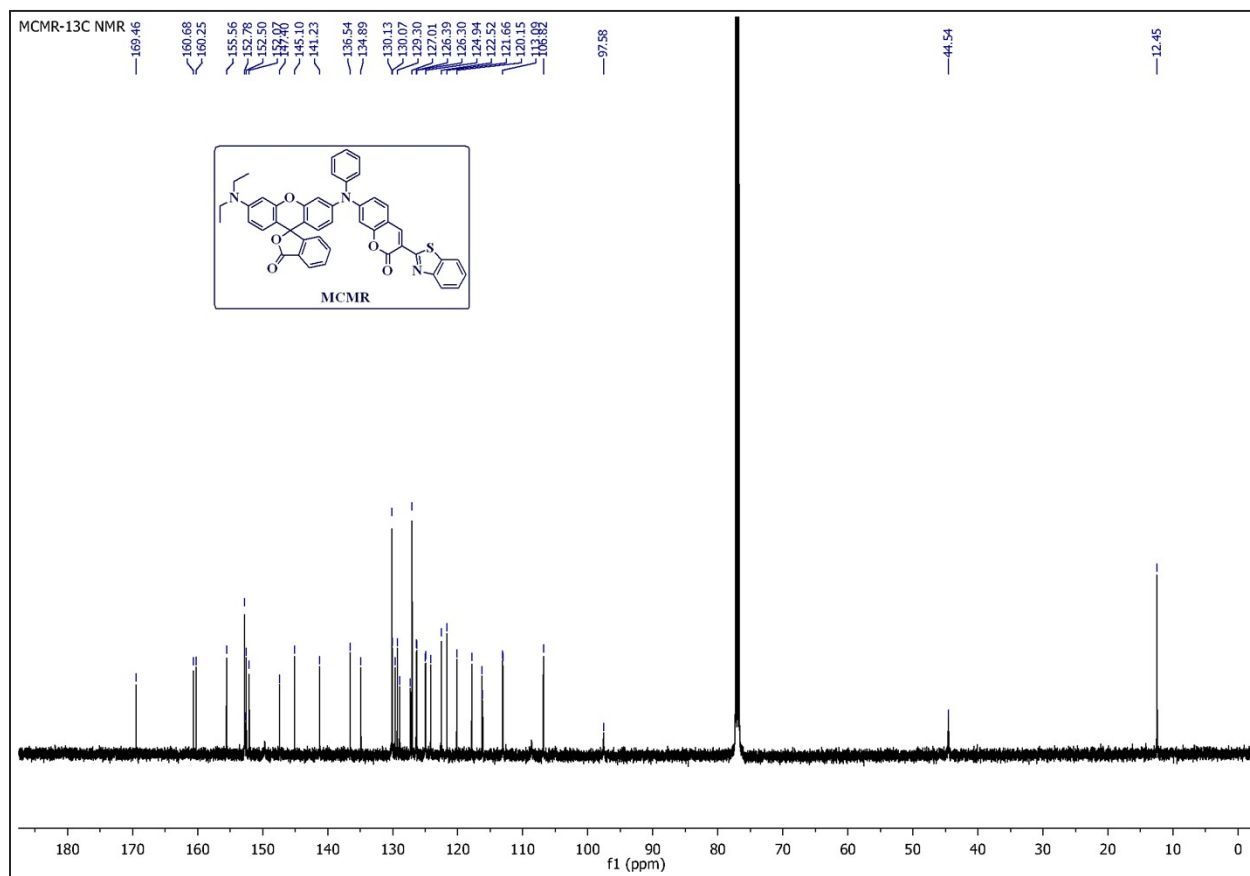

# Spectrum S17: HR-MS spectra of MCMR

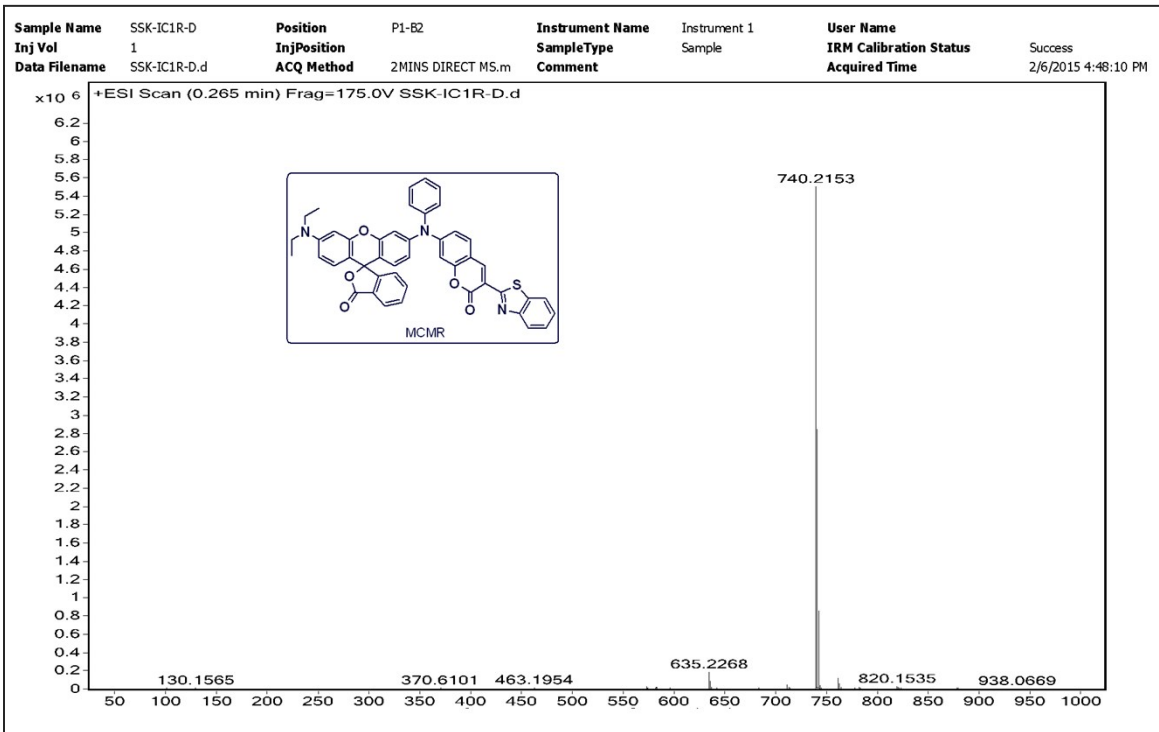

Spectrum S18:  $^1\text{H}$  NMR spectra of MCDR in  $\text{DMSO-d}_6$

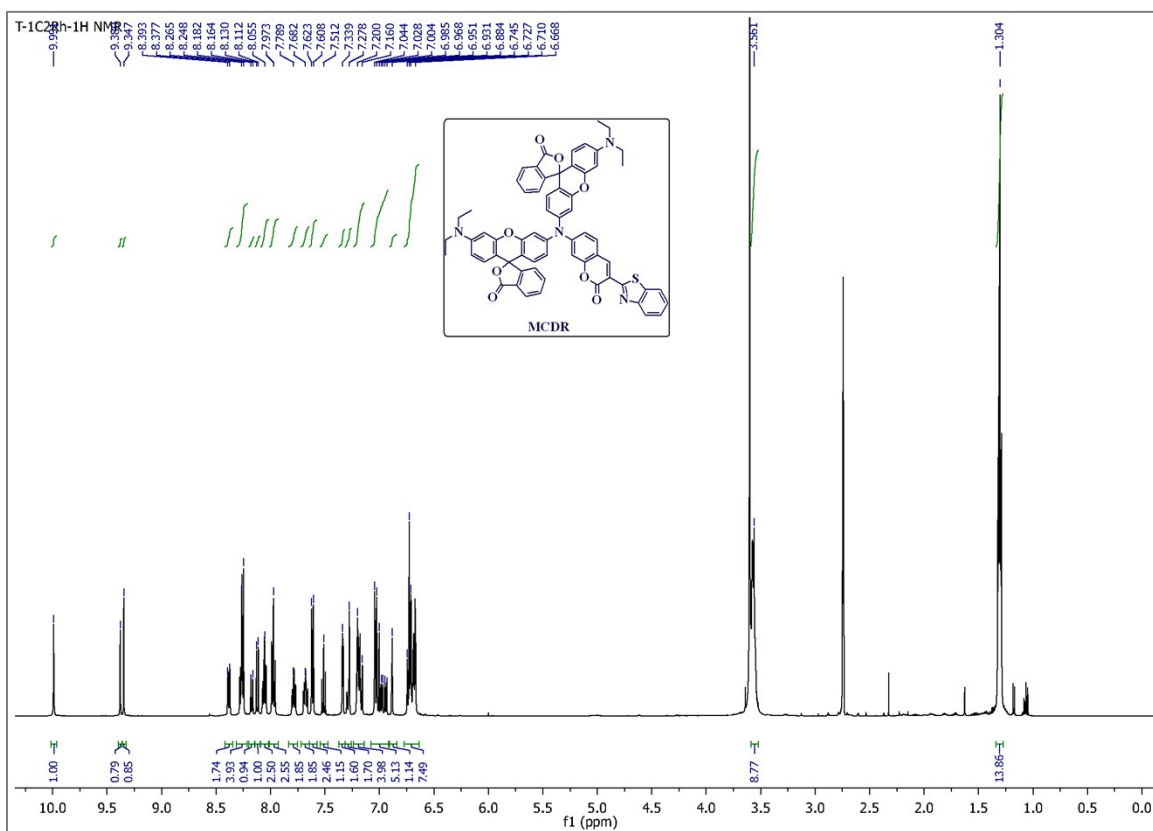

**Spectrum S19:**  $^{13}\text{C}$  NMR spectra of **MCDR** in  $\text{DMSO-d}_6$

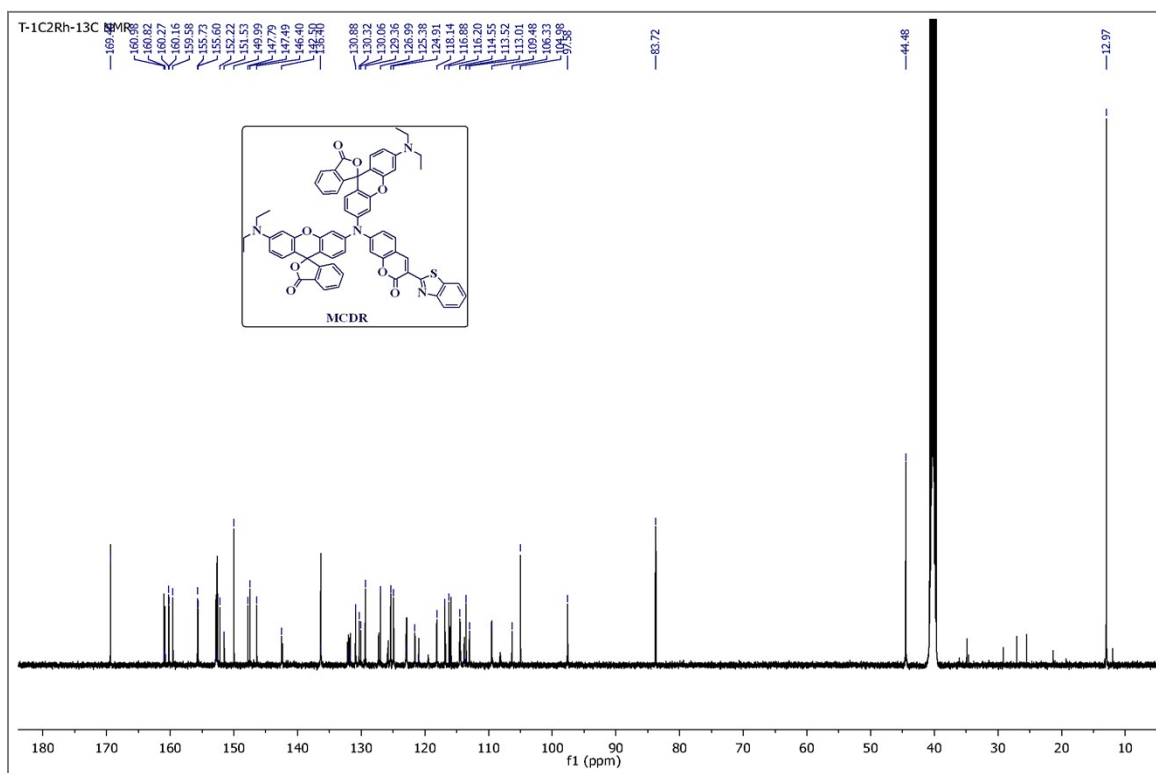



# Spectrum S20: HR-MS spectra of MCDR

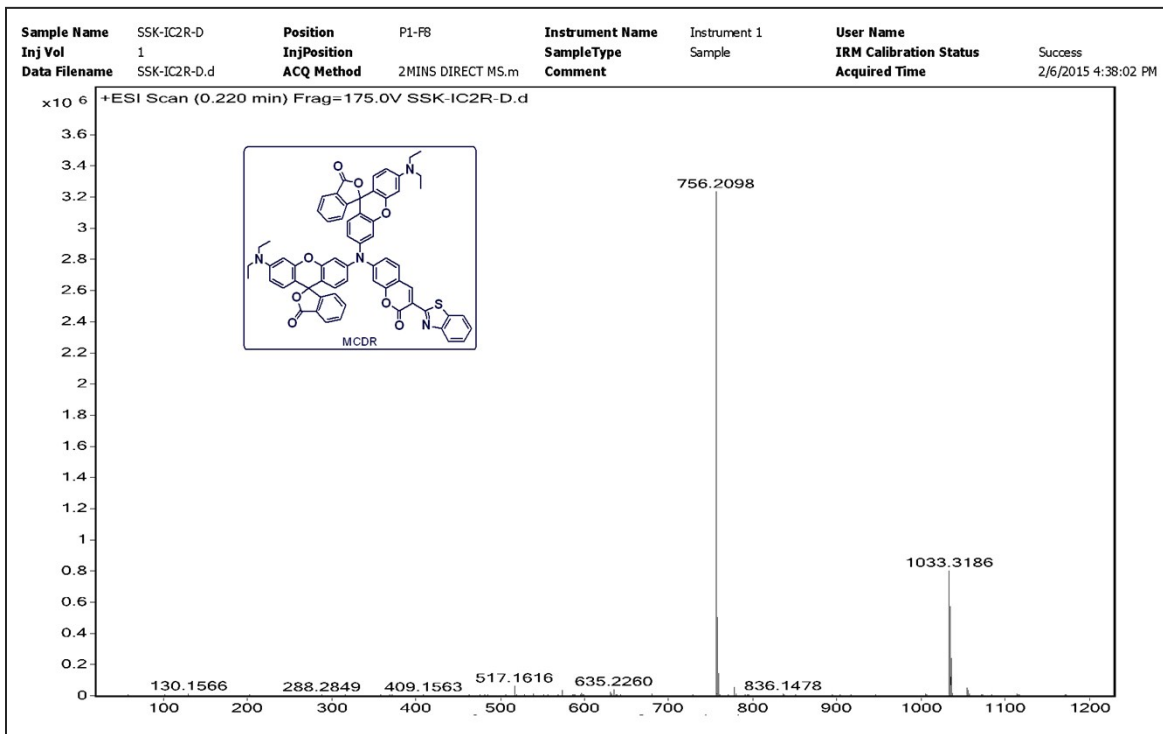

Spectrum S21:  $^1\text{H}$  NMR spectra of DCMR in  $\text{DMSO-d}_6$

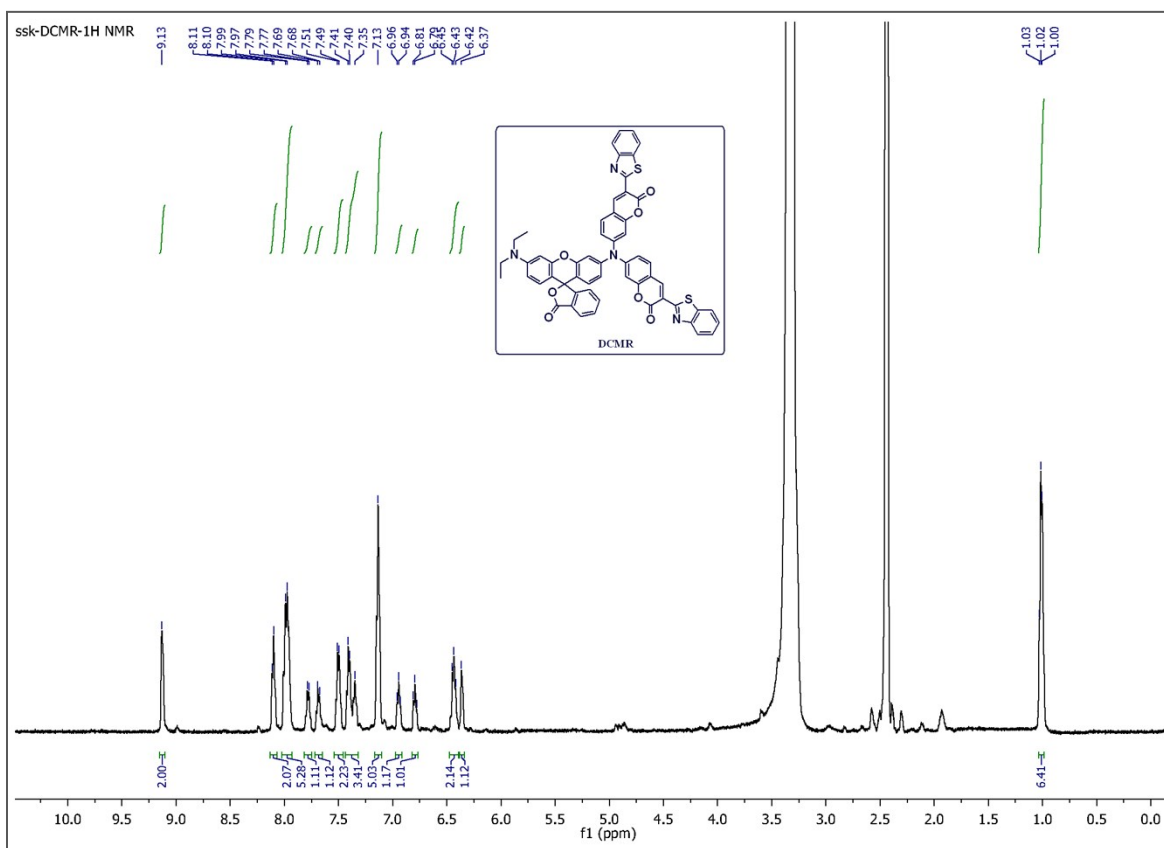

Spectrum S22:  $^{13}\text{C}$  NMR spectra of DCMR in  $\text{DMSO-d}_6$

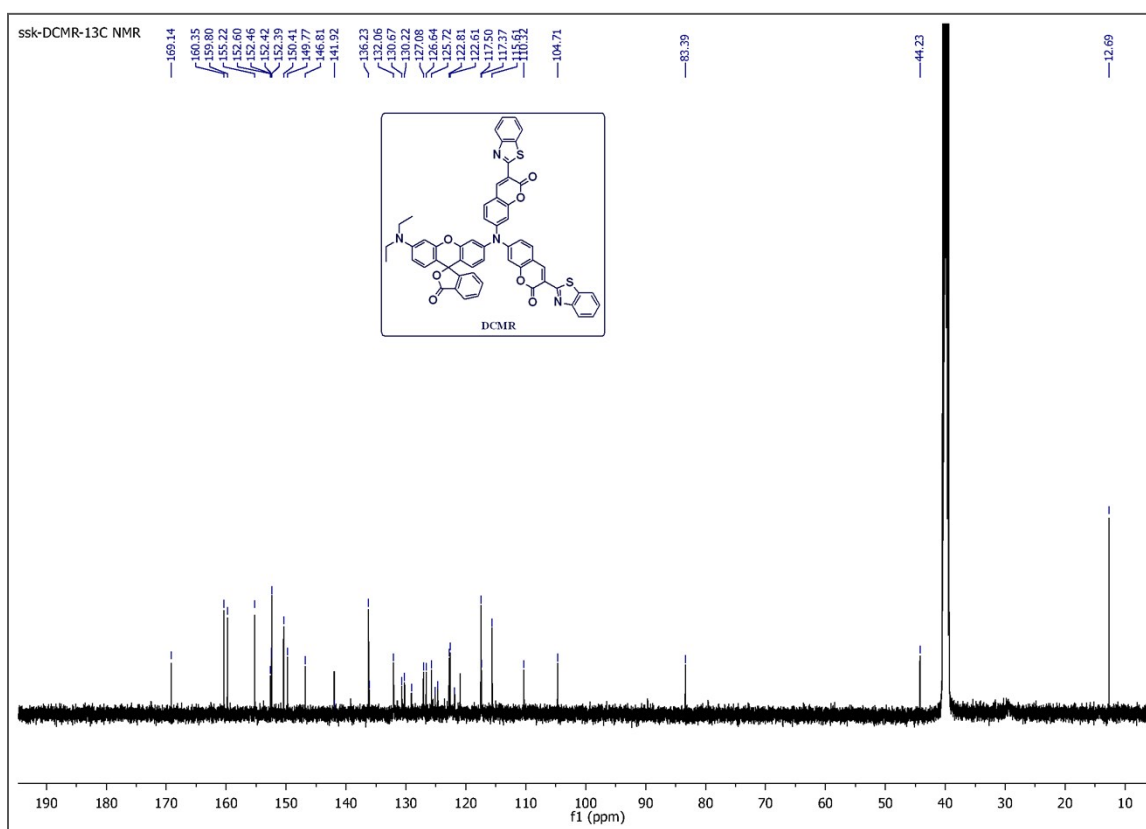

Supplement: c6ra24485h1.pdf [file c6ra24485h1.pdf]
